# Supplementary material for: Molecular mechanisms underlying nanowire formation in pristine phthalocyanine
Source: Royal Society of Chemistry journal article supplement (doi:10.1039/d3cp03512c), 2023-01-01
Supplement: d3cp03512c2.pdf [file d3cp03512c2.pdf]

# Molecular mechanisms underlying nanowire formation in pristine phthalocyanine

Aadil Pinjari, Deepashri Saraf\*, and Durba Sengupta†

CSIR-National Chemical Laboratory,  
Dr. Homi Bhabha Road, Pune 411008, India

\*E-mail d.saraf@ncl.res.in

†E-mail d.sengupta@ncl.res.in

Table S1: List of different concentrations of phthalocyanine aggregates simulated in terms of number ratios and corresponding molar concentrations.

| Number ratio | Concentration (M)         |
|--------------|---------------------------|
| 1:50         | 1106.38                   |
| 1:60         | 922.03                    |
| 1:80         | 691.46                    |
| 1:118        | 468.15                    |
| 1:125        | 442.56                    |
| 1:250        | 221.28                    |
| 1:259        | 213.51                    |
| 1:817        | 65.68 (Replicate sets: 4) |
| 1:1069       | 57.73 (Replicate sets: 4) |

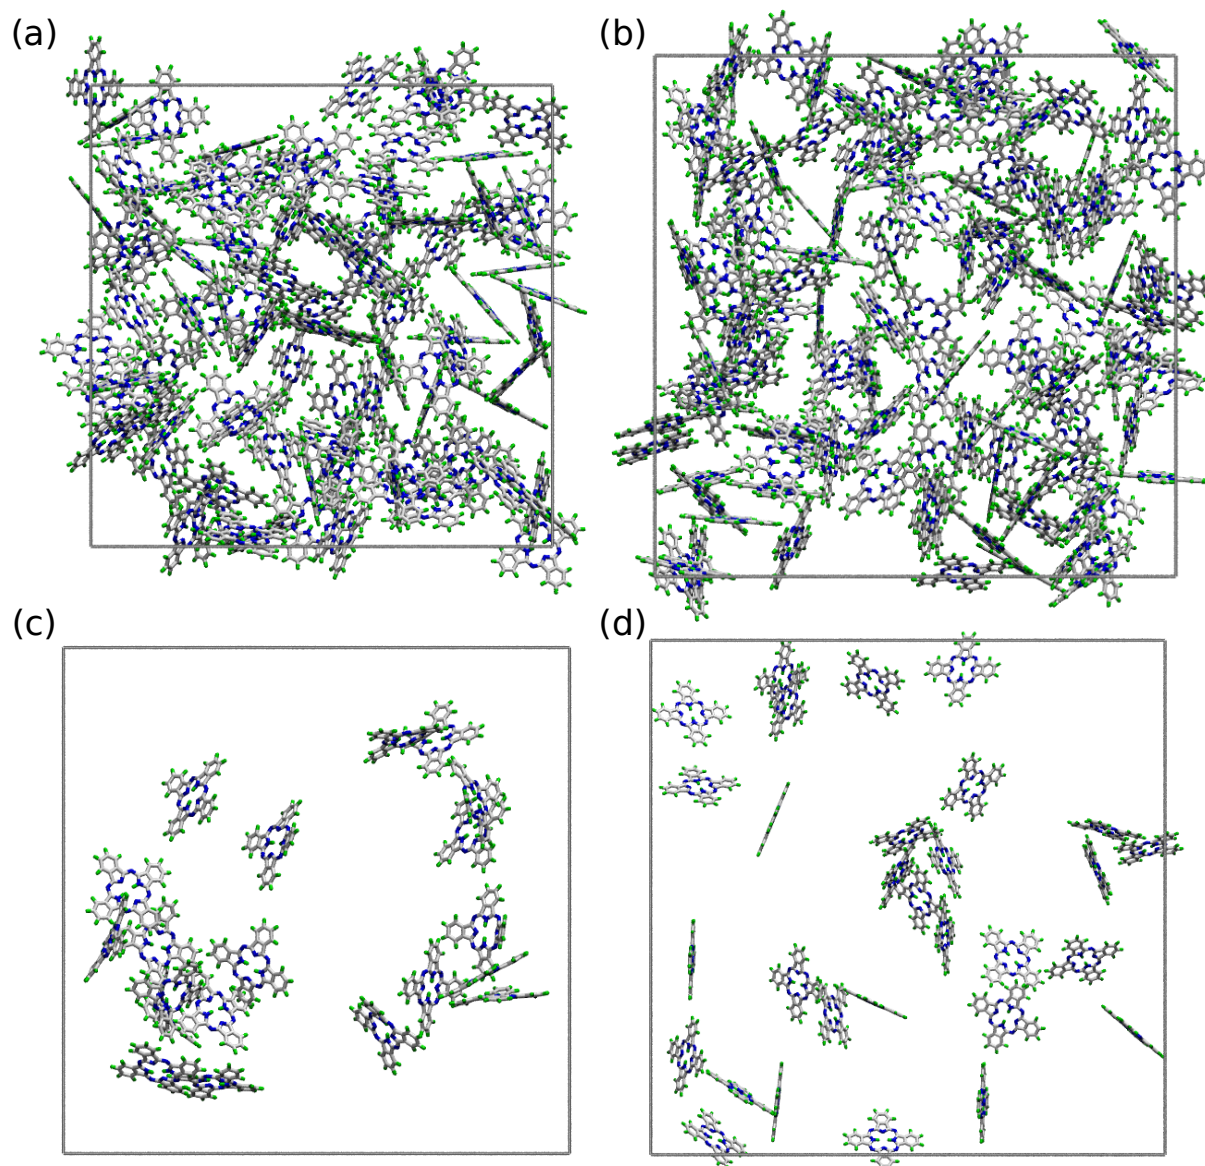

Figure S1: Snapshots of initial random arrangements of phthalocyanine molecules at number ratios (a) 1:60, (b) 1:250, (c) 1:817, (d) 1:1069. The surrounding water molecules are not shown for clarity.

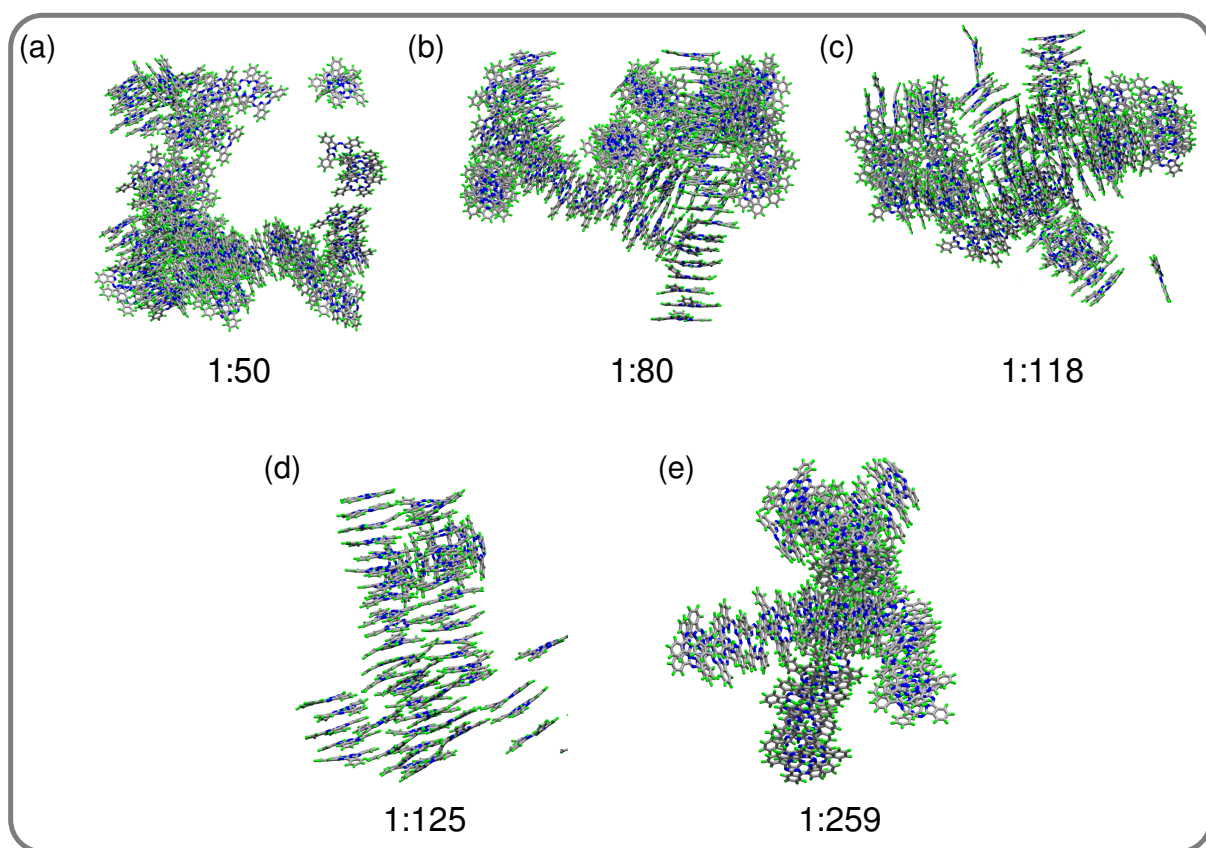

Figure S2: Representative snapshots of phthalocyanine aggregates at number ratios (a) 1:50, (b) 1:80, (c) 1:118, (d) 1:125, (e) 1:259. The surrounding water molecules are not shown for clarity.

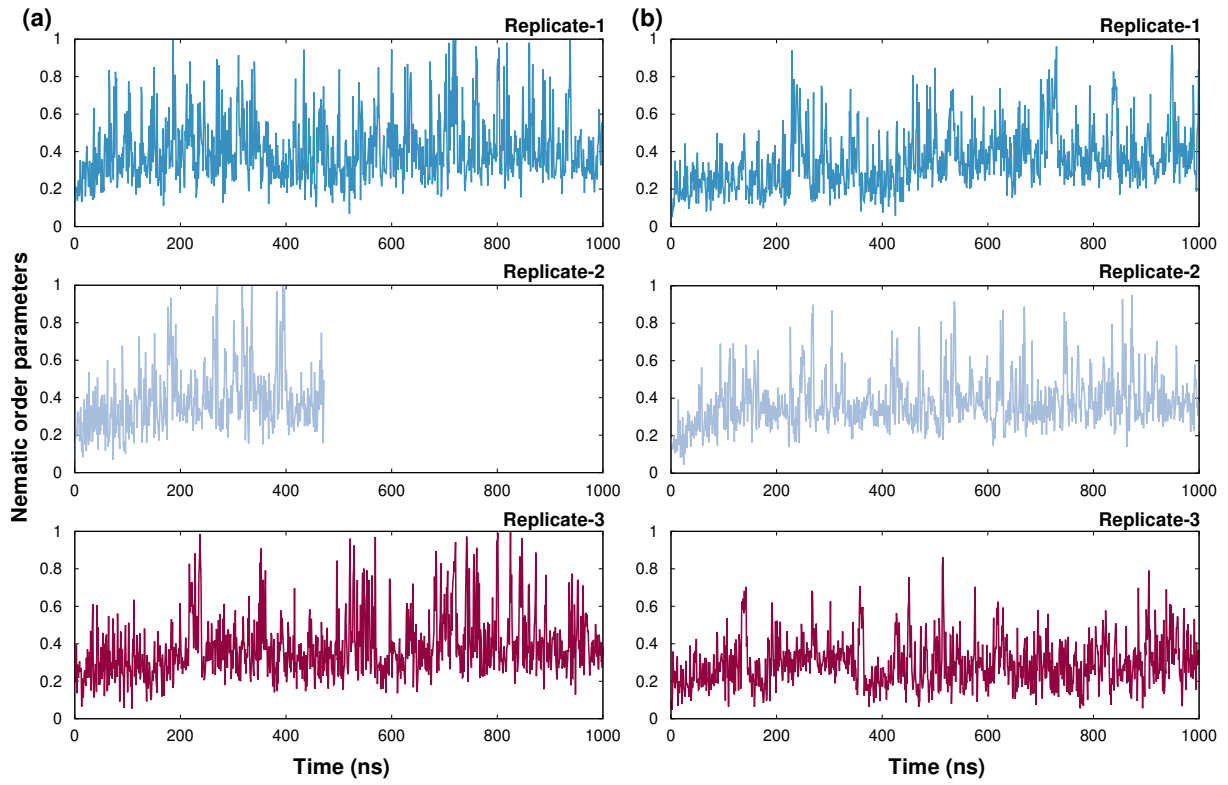

Figure S3: Nematic order parameter of different replicates for number ratios (a) 1:817 and (b) 1:1069.

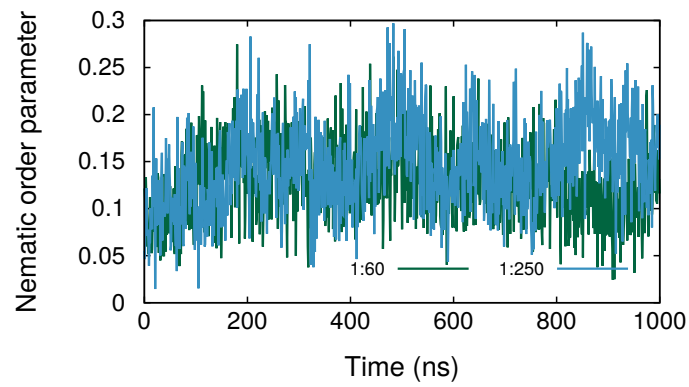

Figure S4: Nematic order parameter for number ratios 1:60 and 1:250.

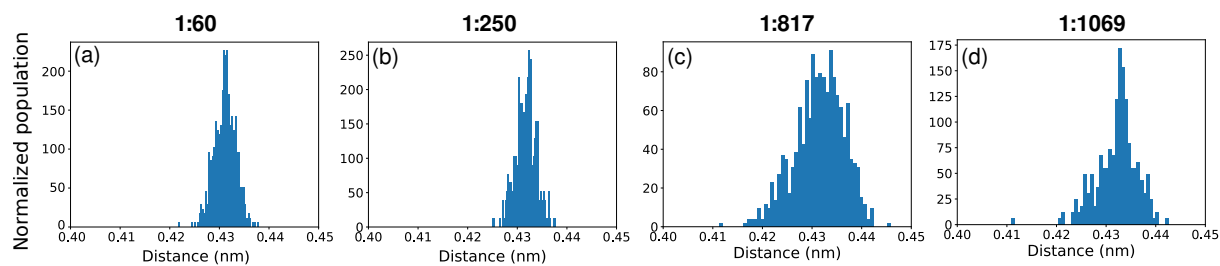

Figure S5: Population histograms of distribution of distances between pairs of neighboring molecules in phthalocyanine self-assemblies of number ratios (a) 1:60, (b) 1:250, (c) 1:817, (d) 1:1069.

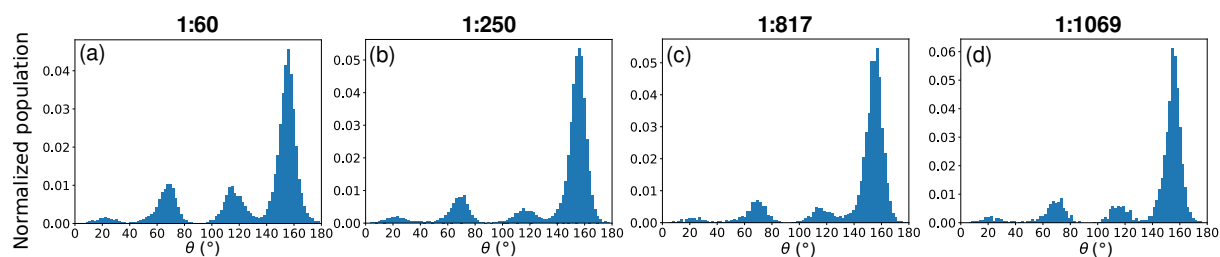

Figure S6: Population histograms of distribution of angles between pairs of neighboring molecules in phthalocyanine self-assemblies at number ratios (a) 1:60, (b) 1:250, (c) 1:817, (d) 1:1069.
