# Supplementary figures and images for: Molecular mechanisms underlying nanowire formation in pristine phthalocyanine
Source: Royal Society of Chemistry journal article supplement (doi:10.1039/d3cp03512c), 2023-01-01

**(a)**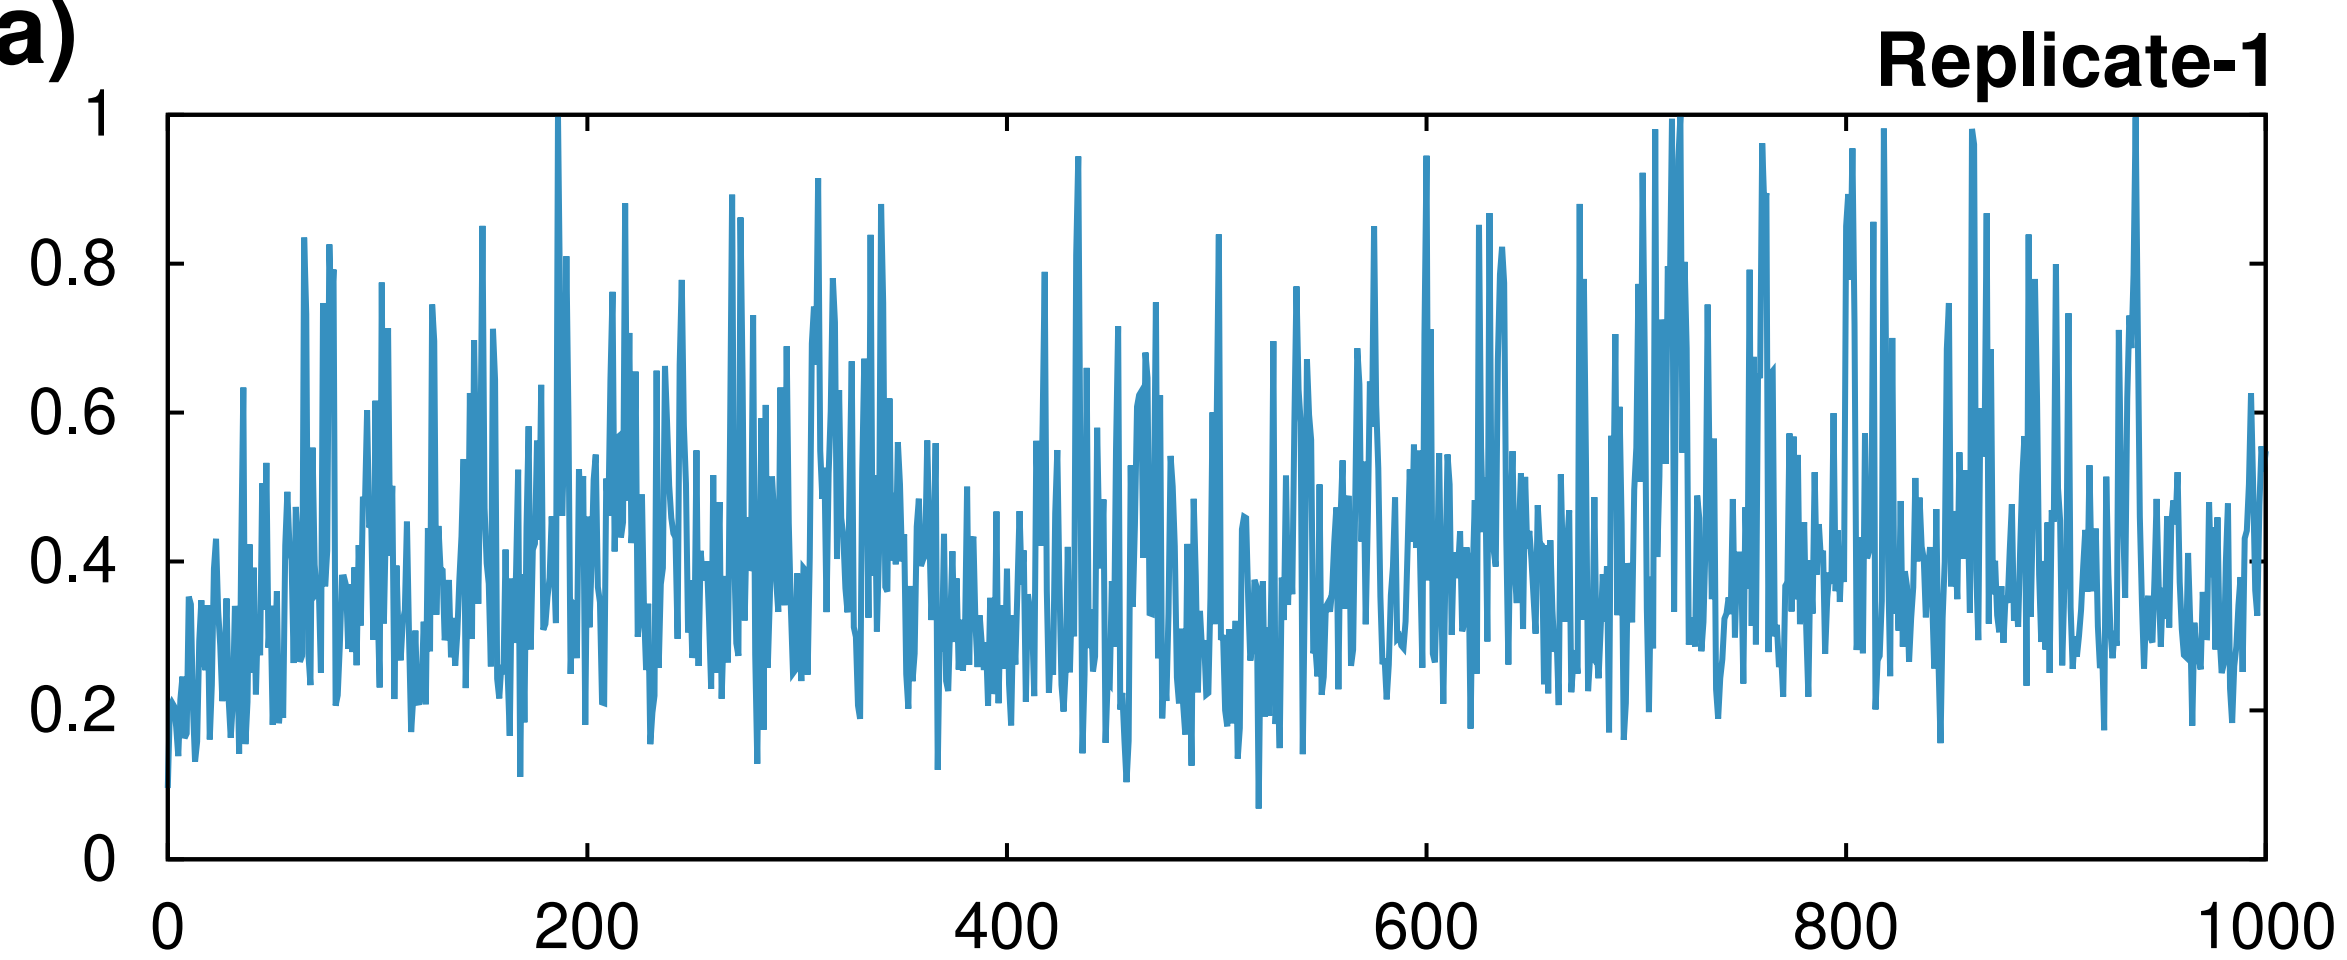**Nematic order parameters**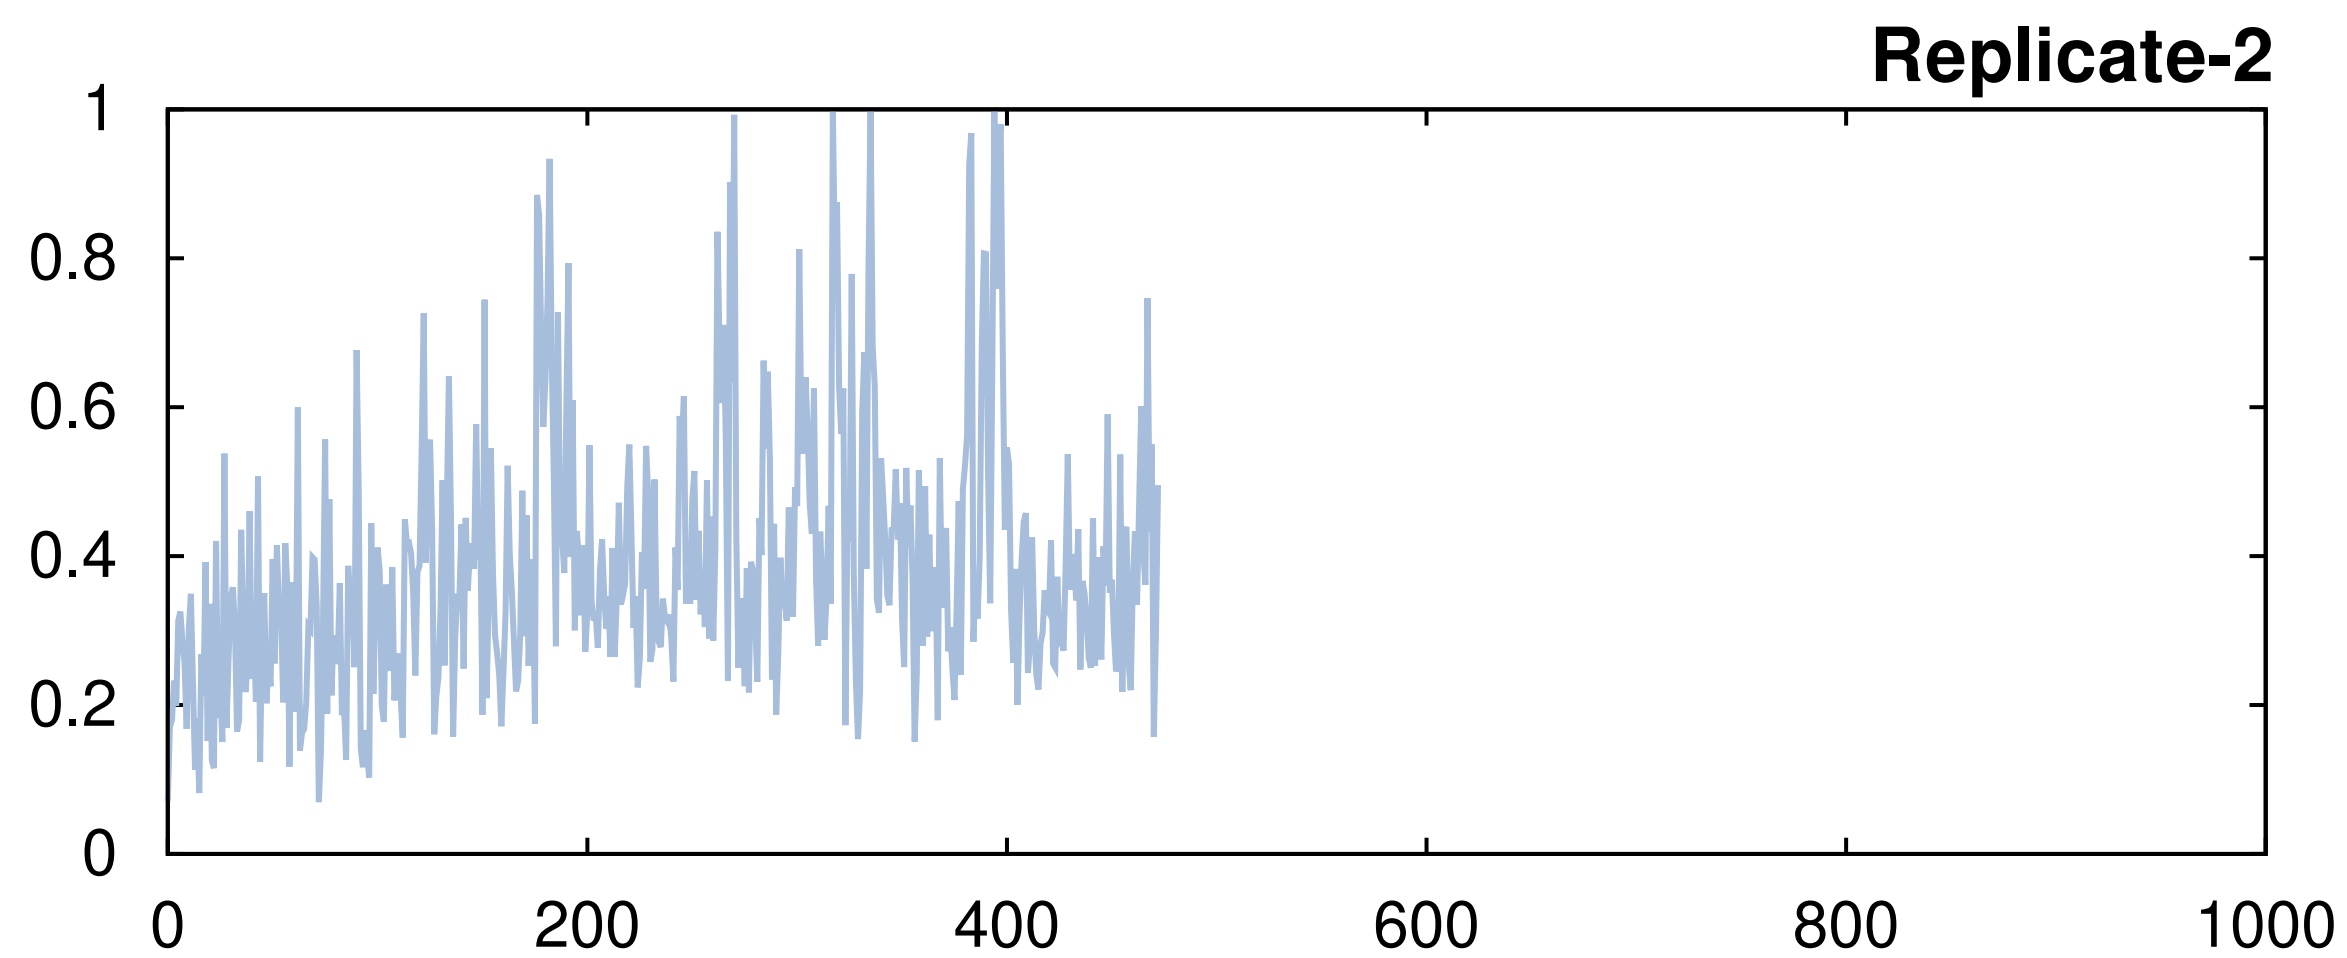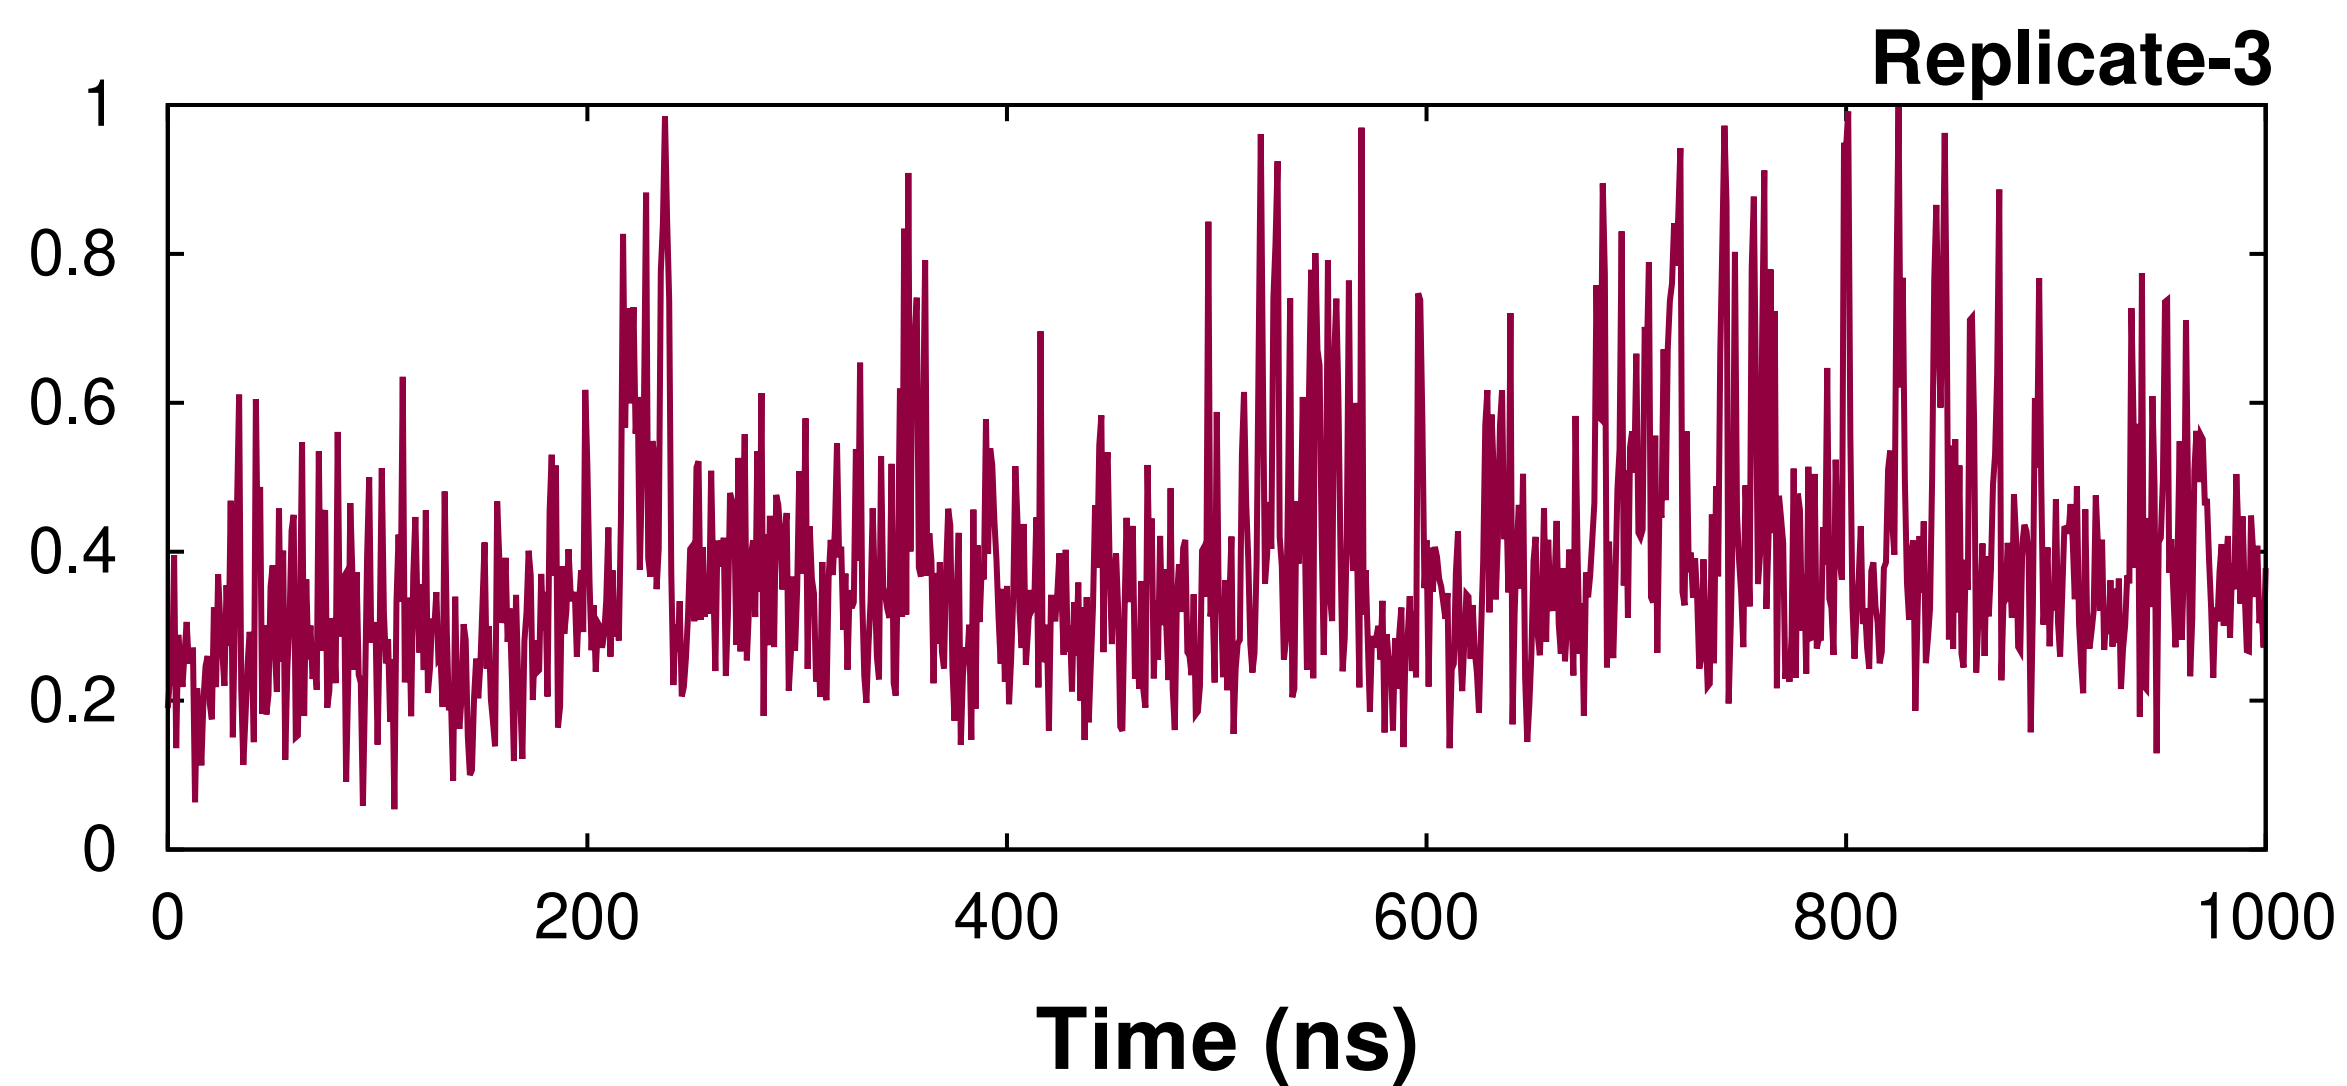**(b)**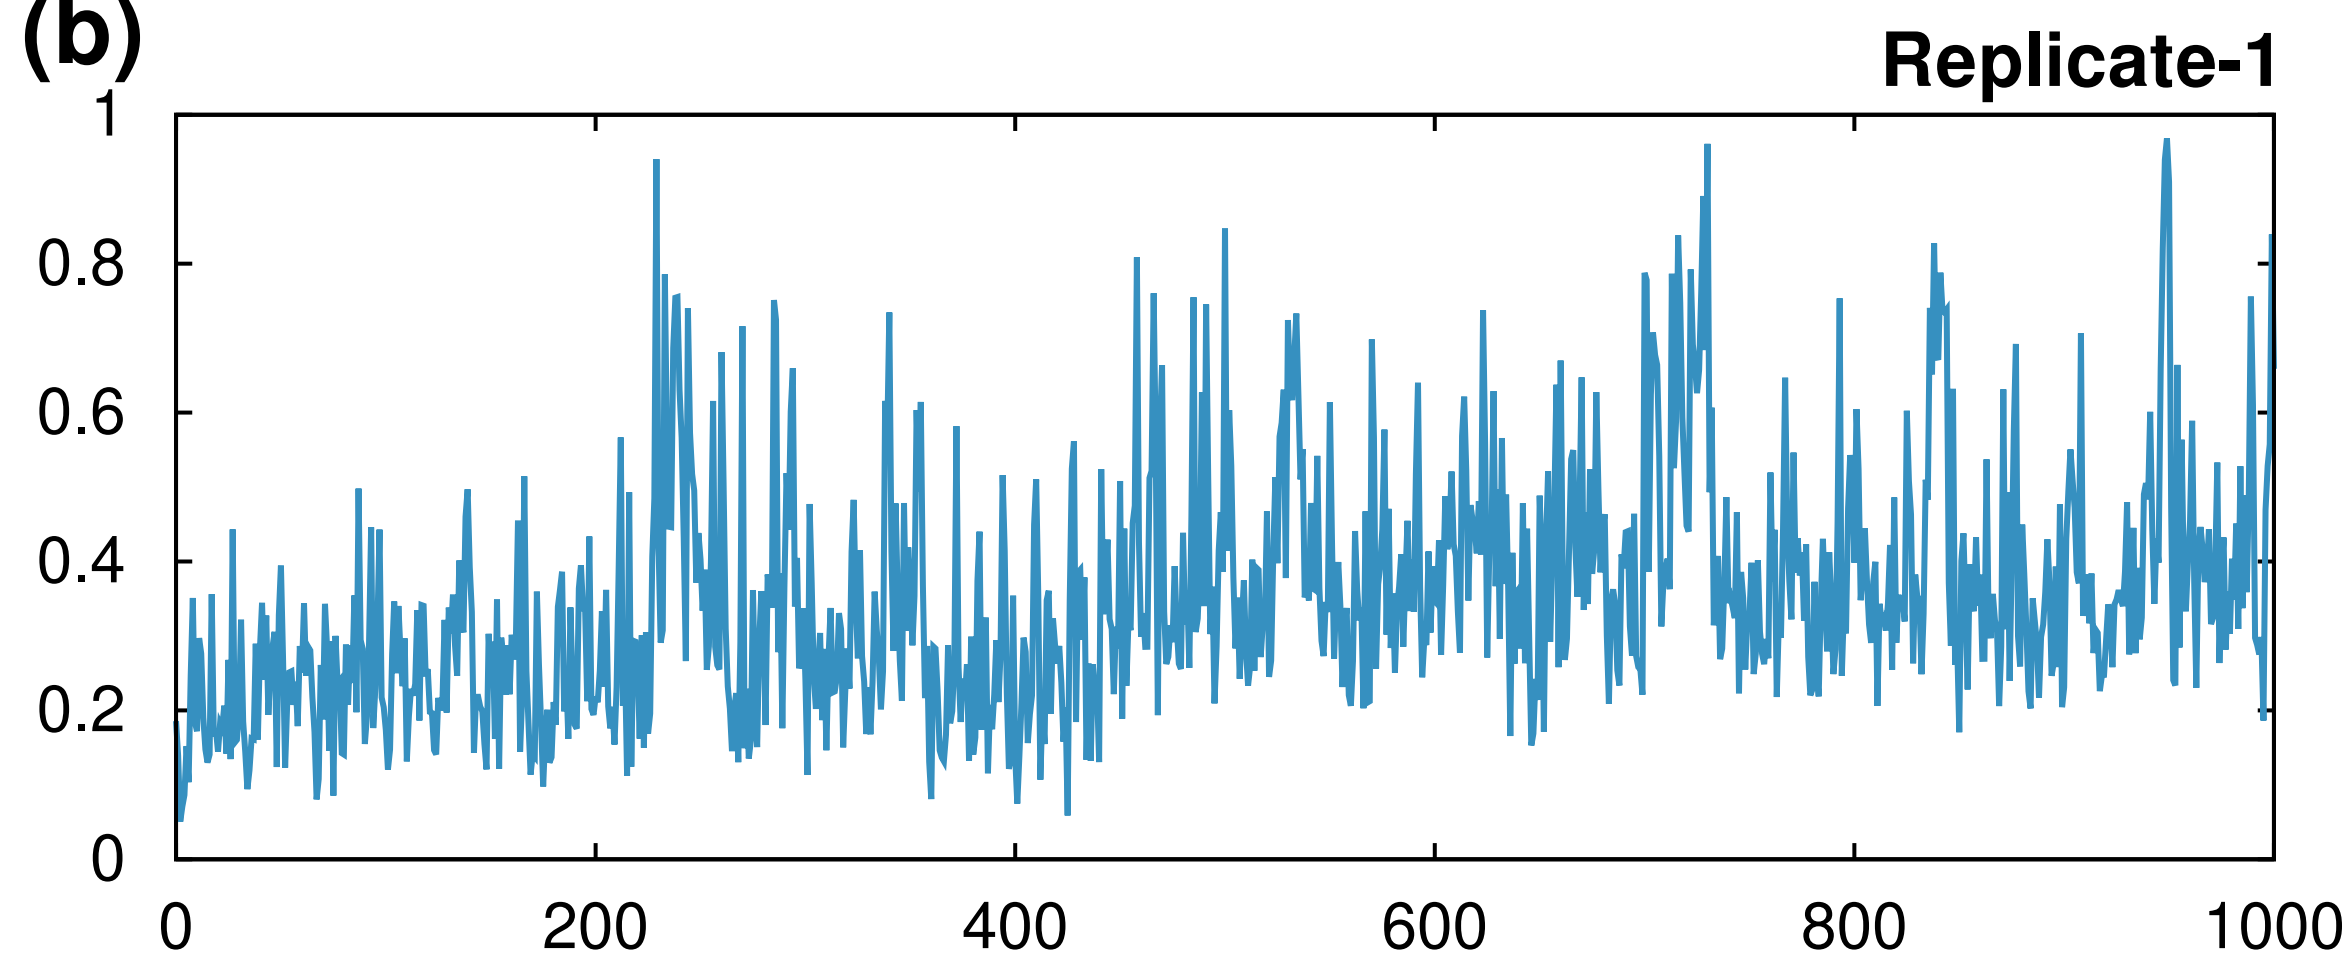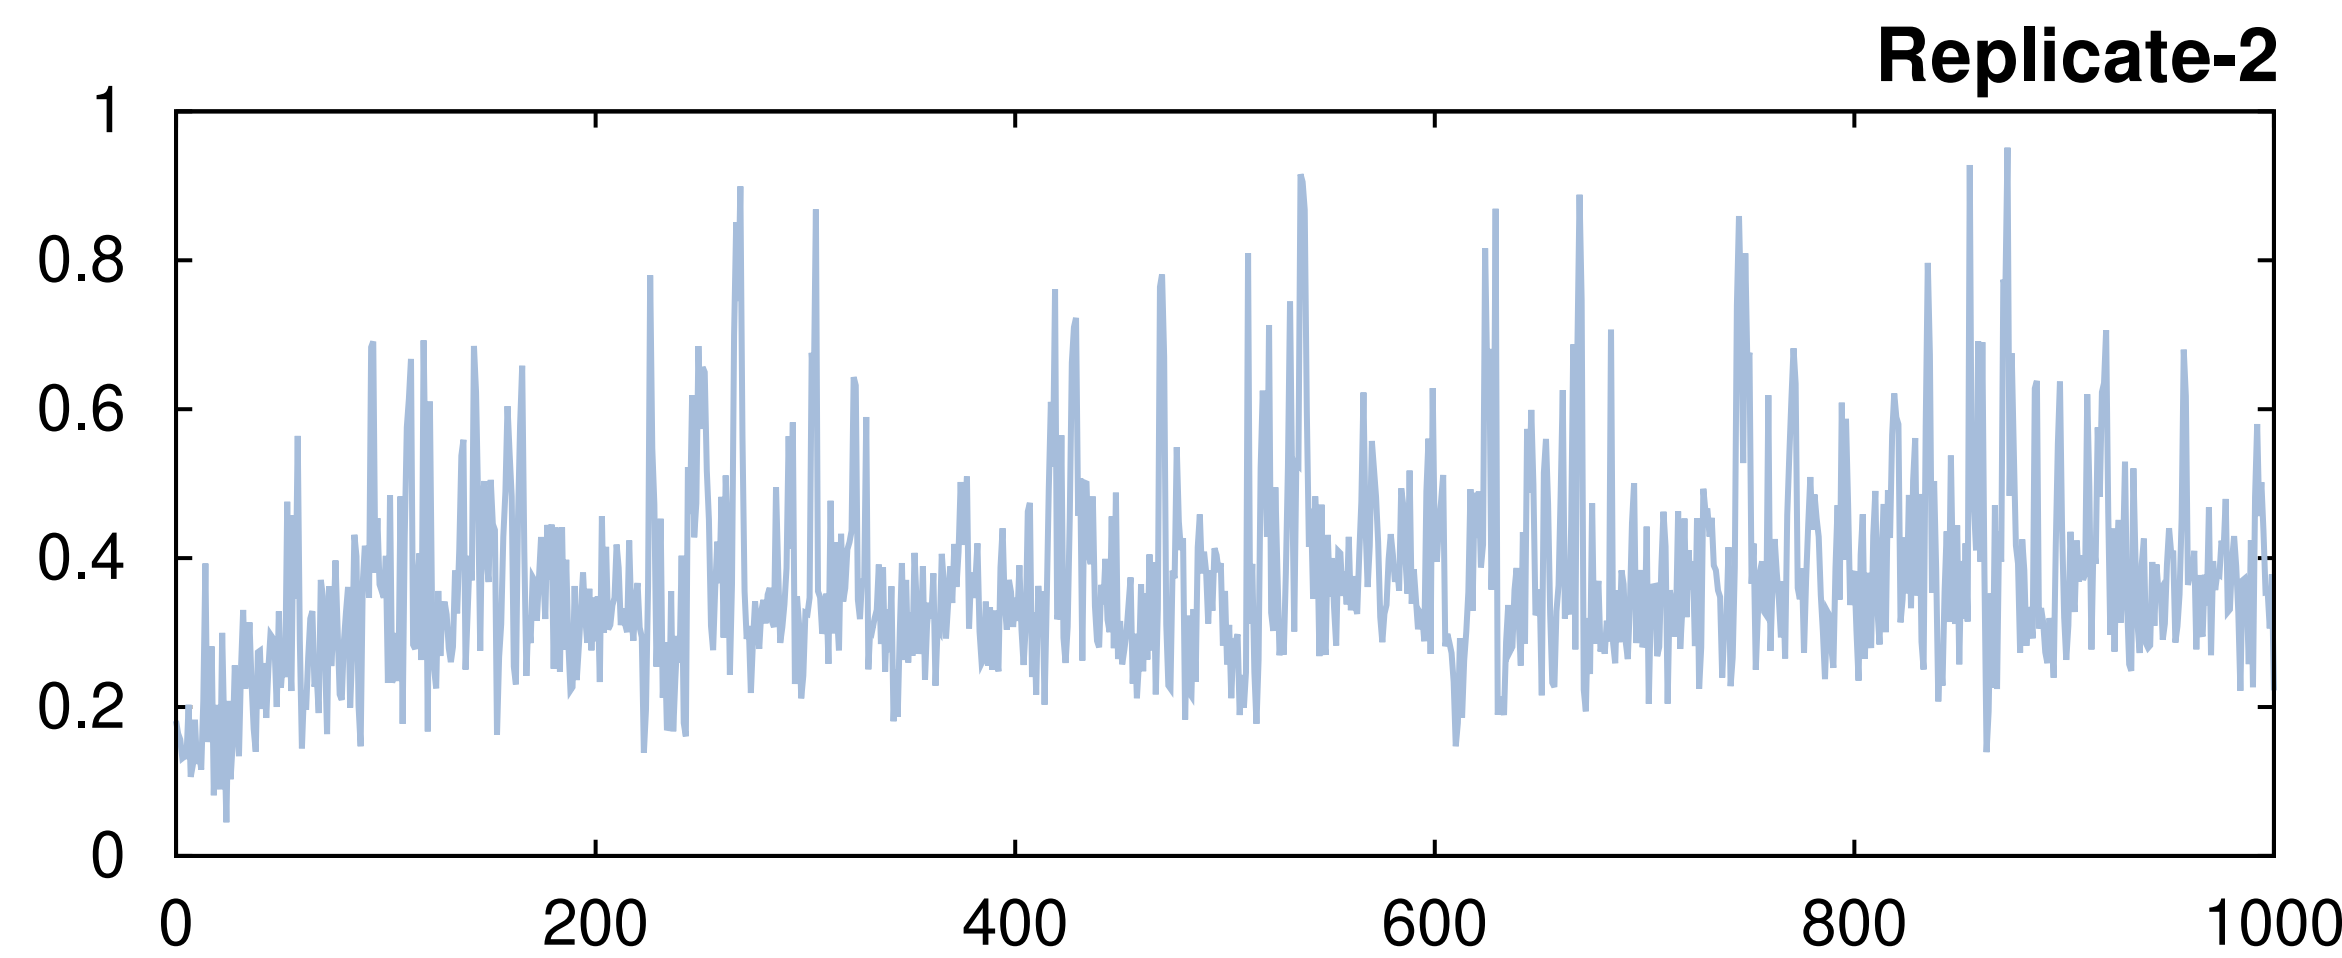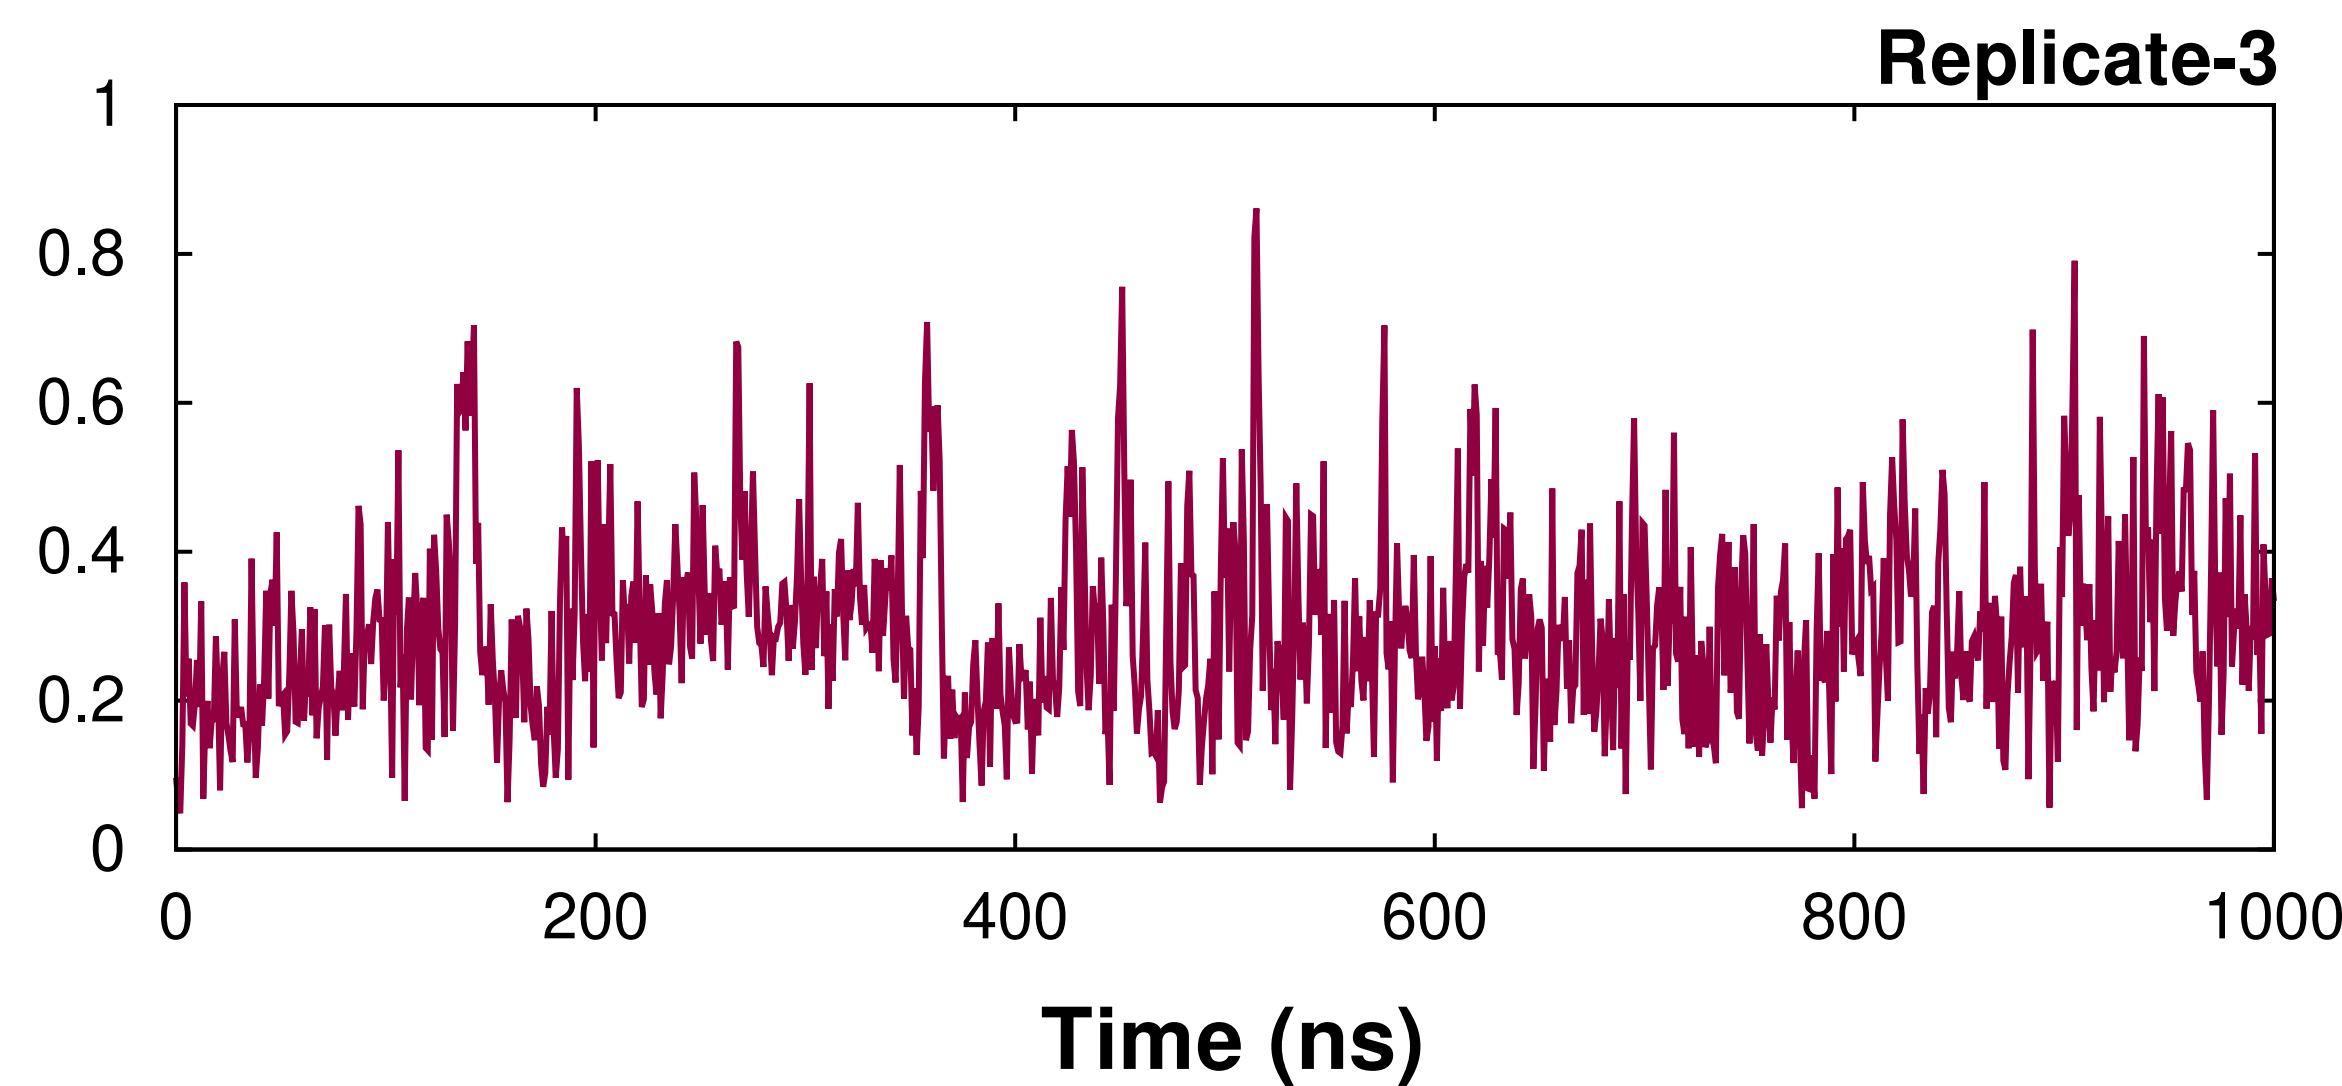

Supplement: d3cp03512c1.zip [file d3cp03512c1.zip]

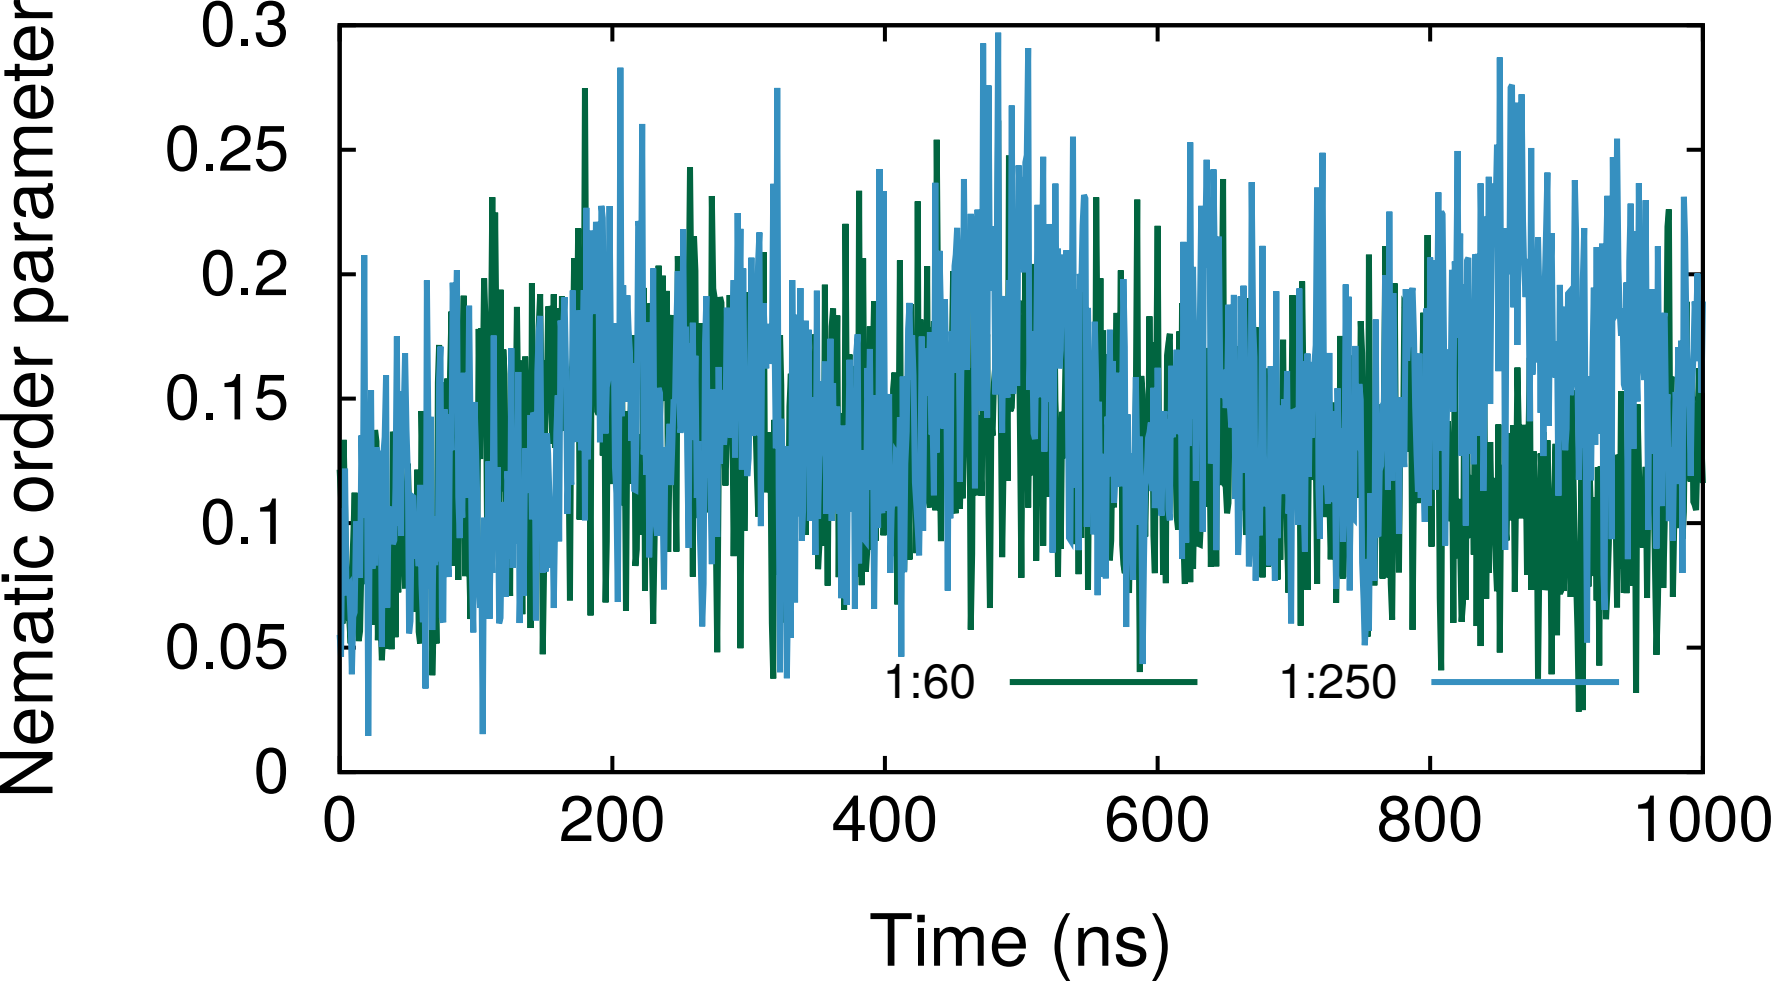

Supplement: d3cp03512c1.zip [file d3cp03512c1.zip]

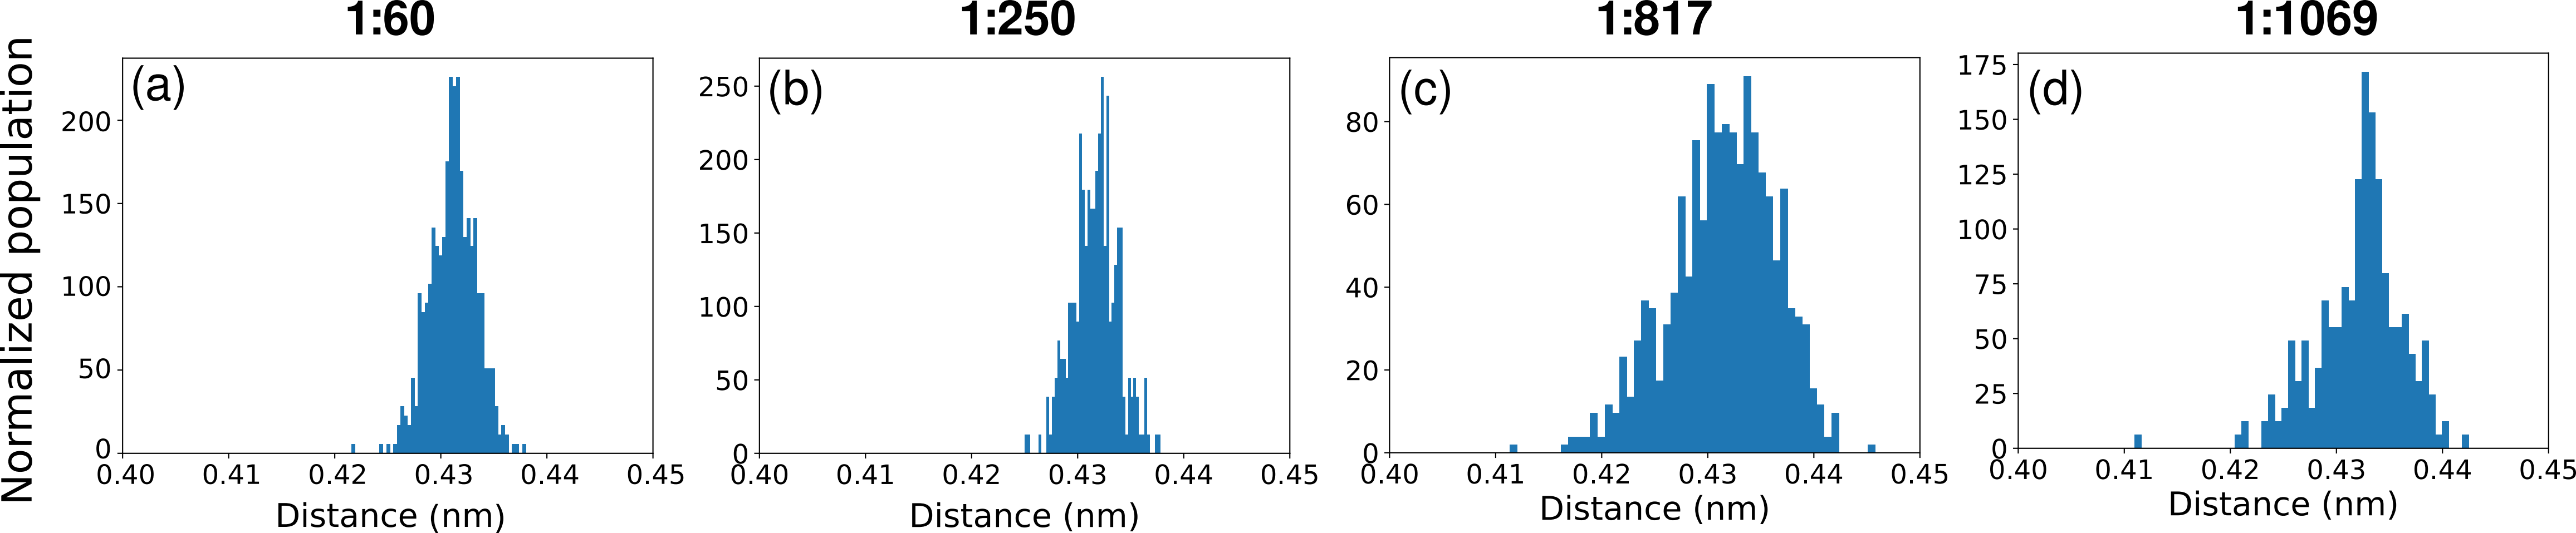

Supplement: d3cp03512c1.zip [file d3cp03512c1.zip]

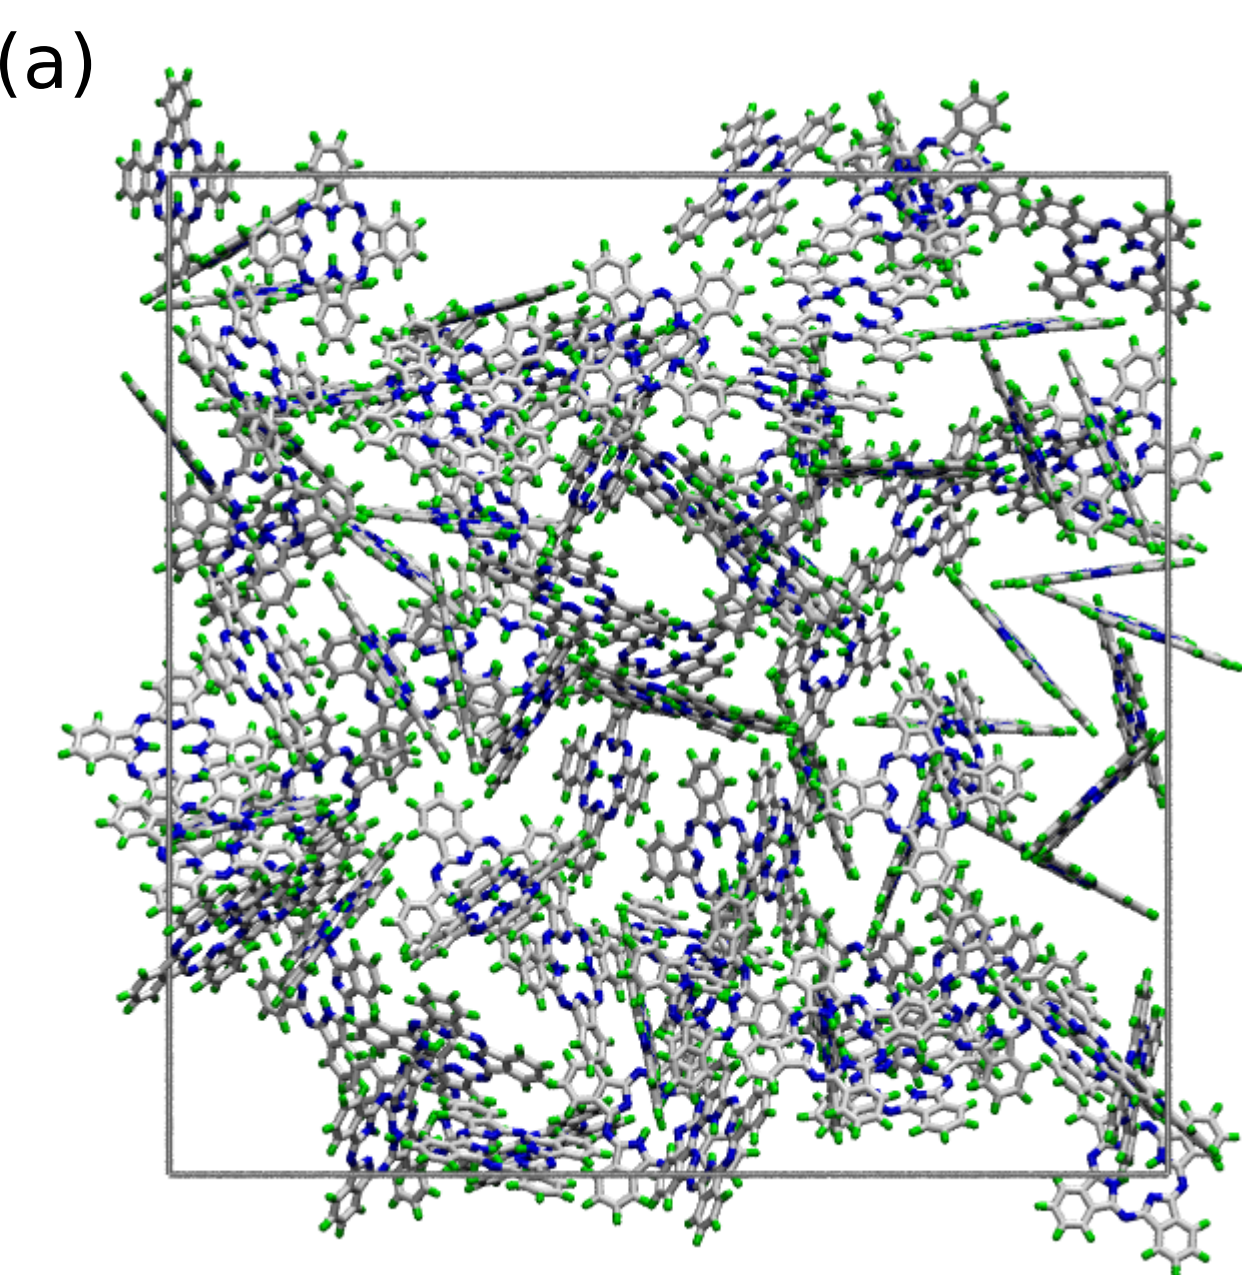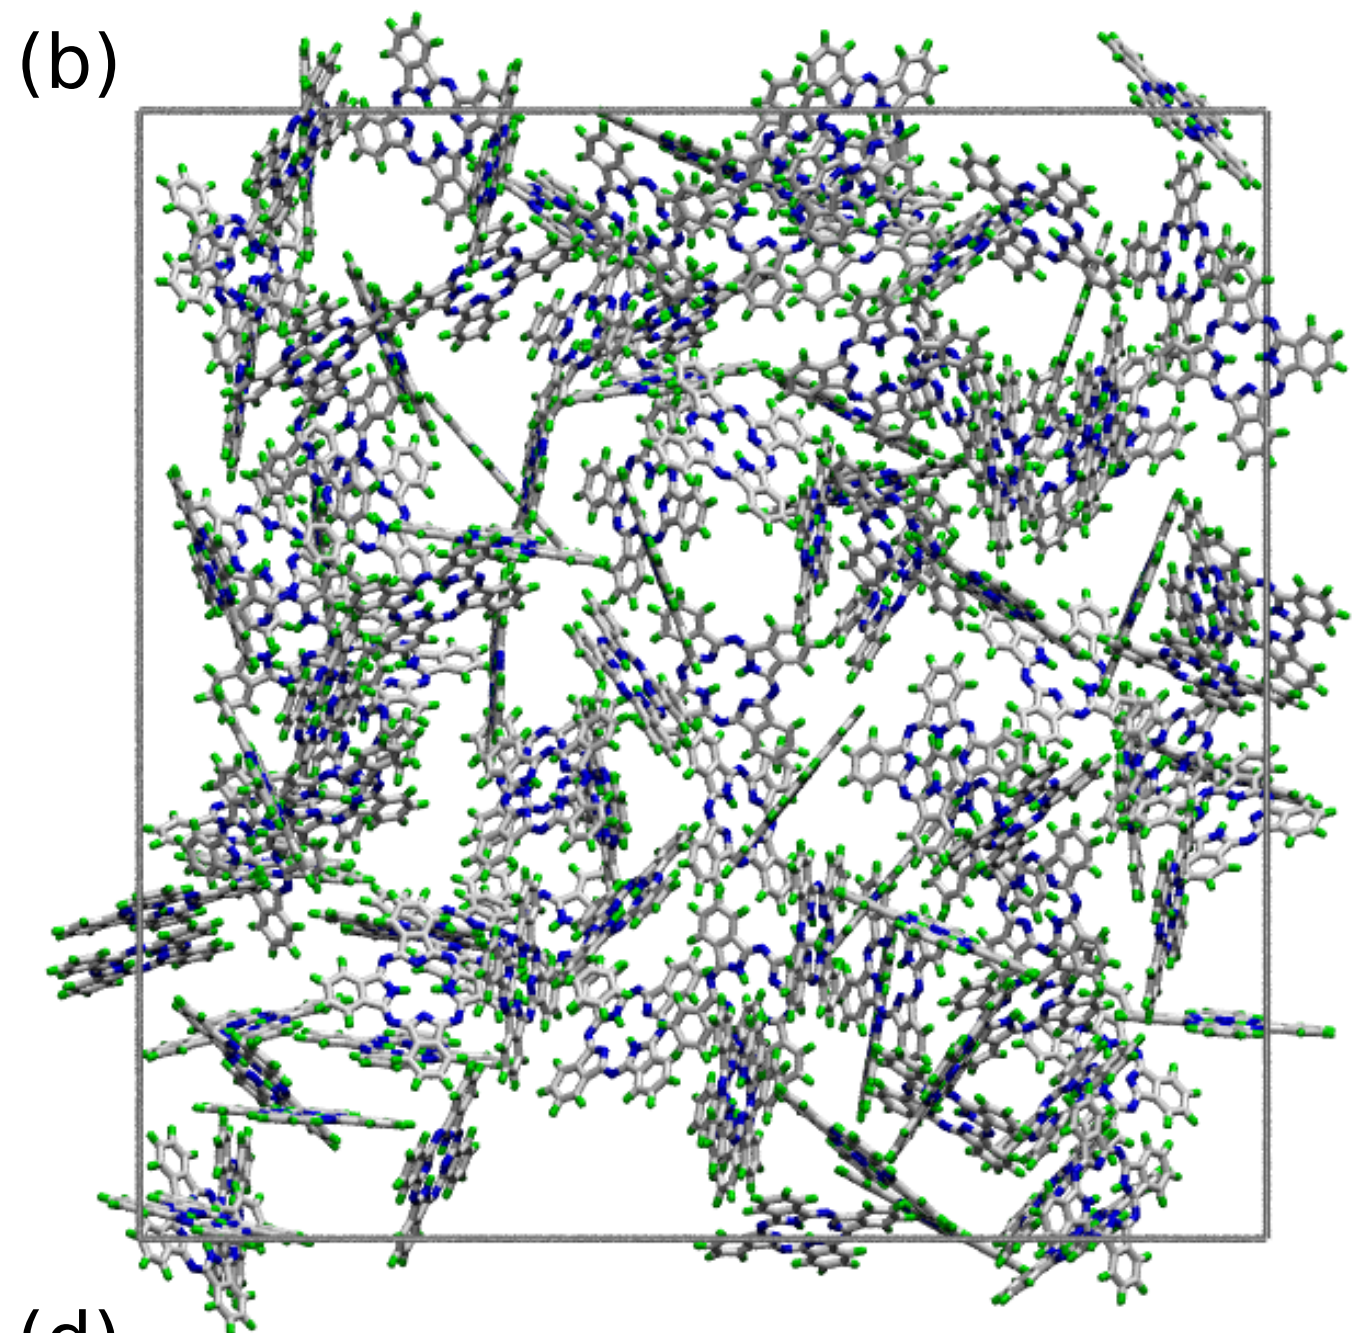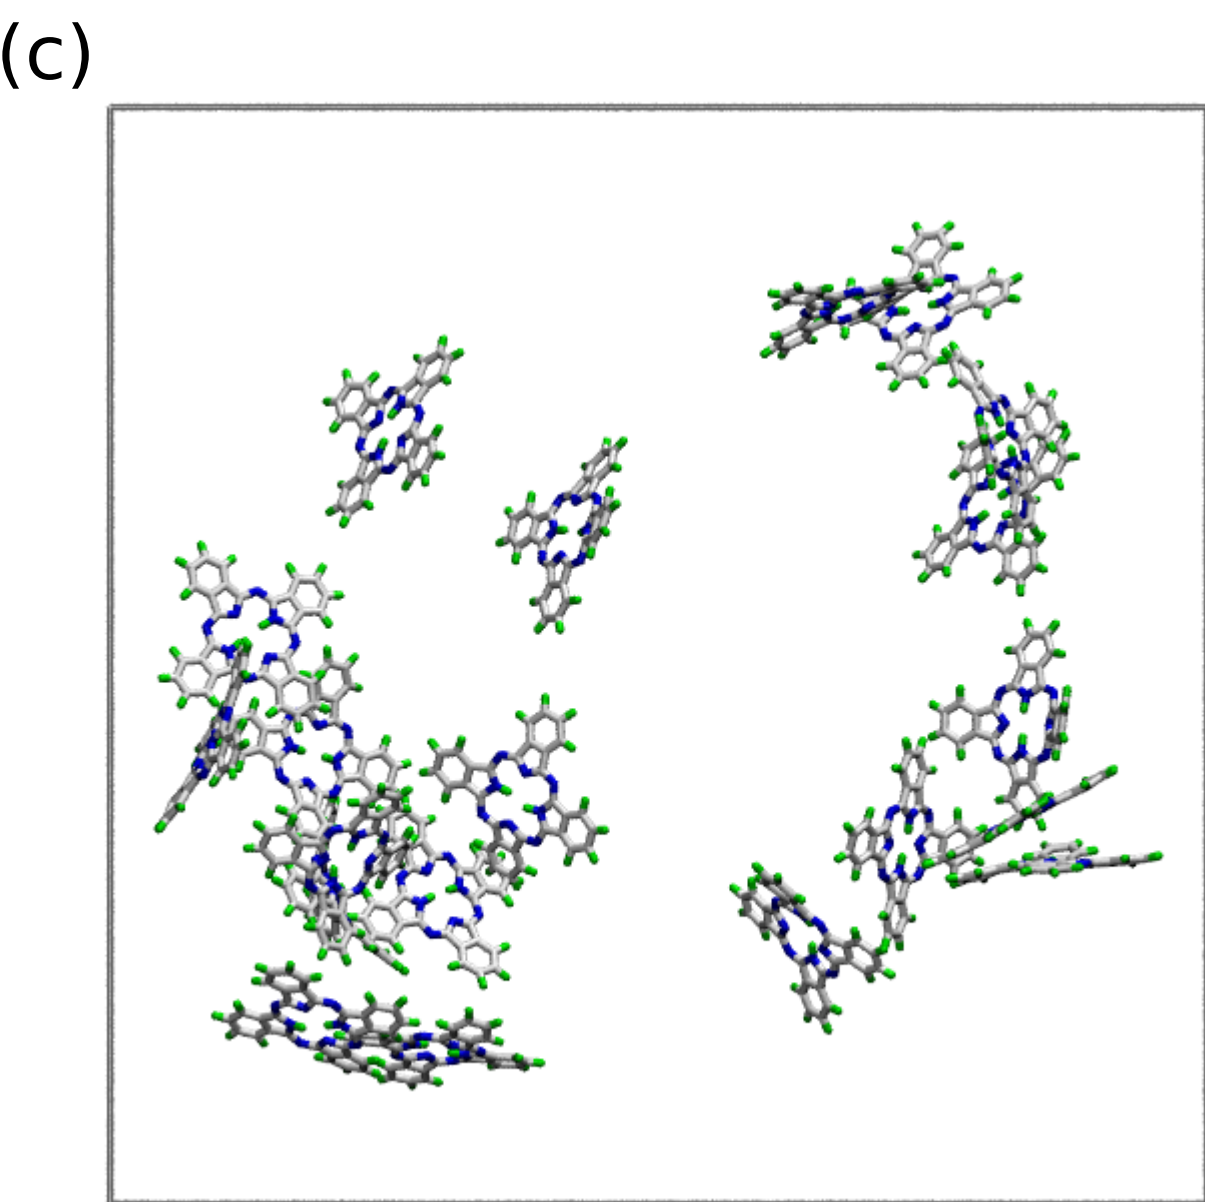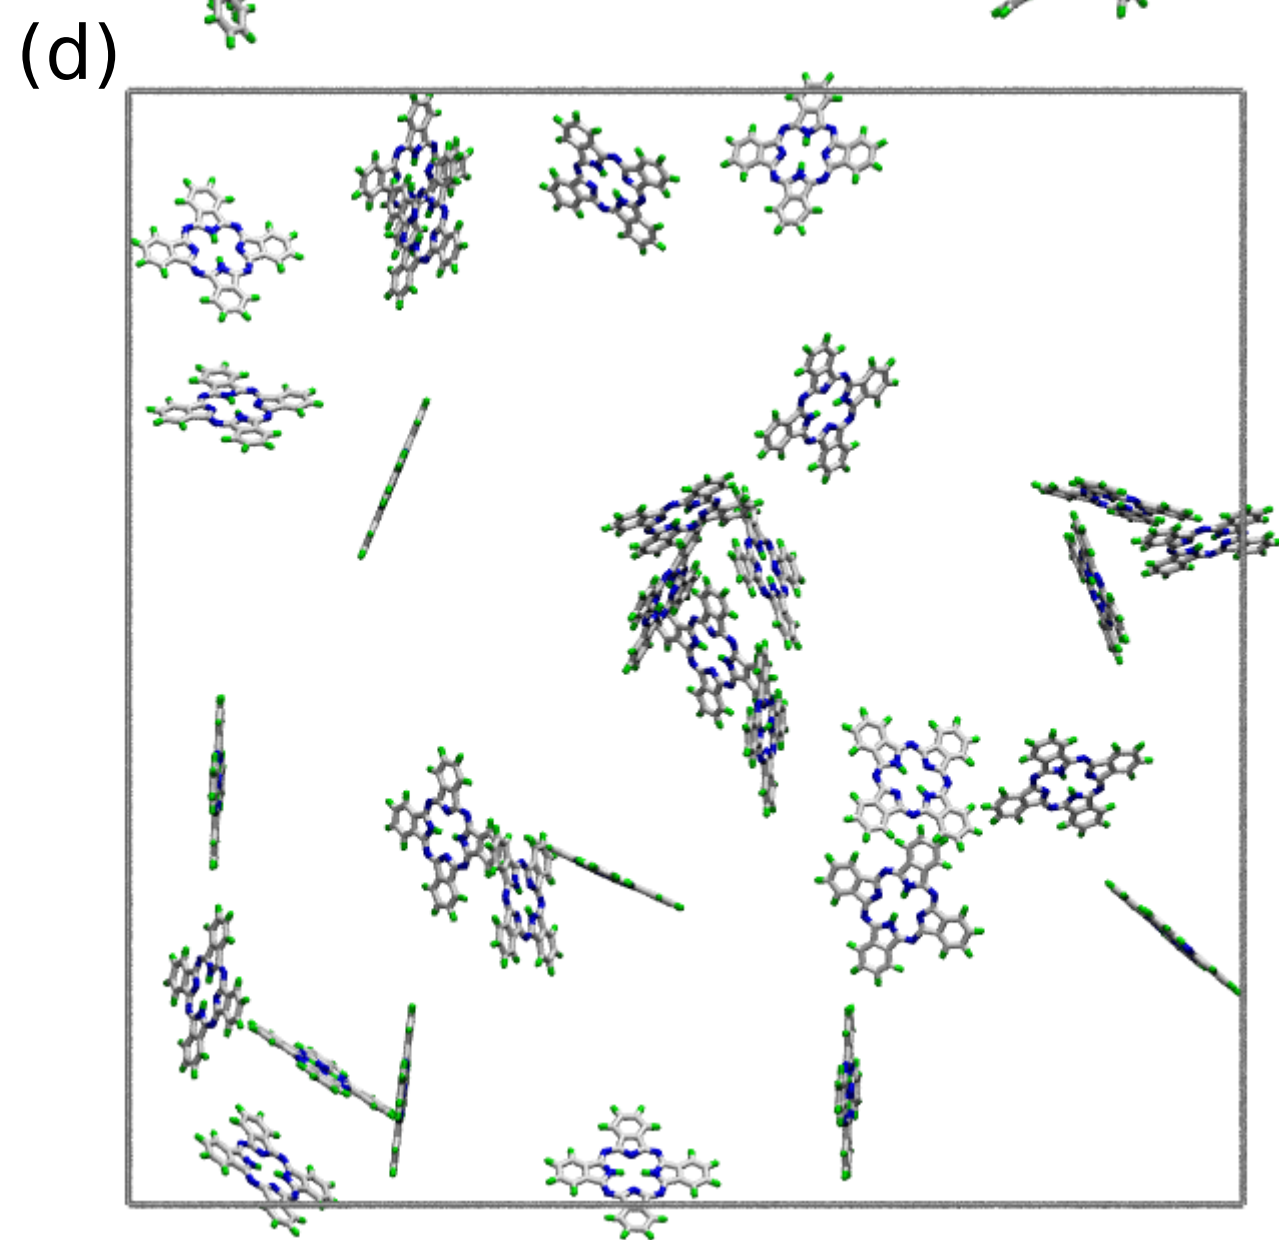

Supplement: d3cp03512c1.zip [file d3cp03512c1.zip]

(a)

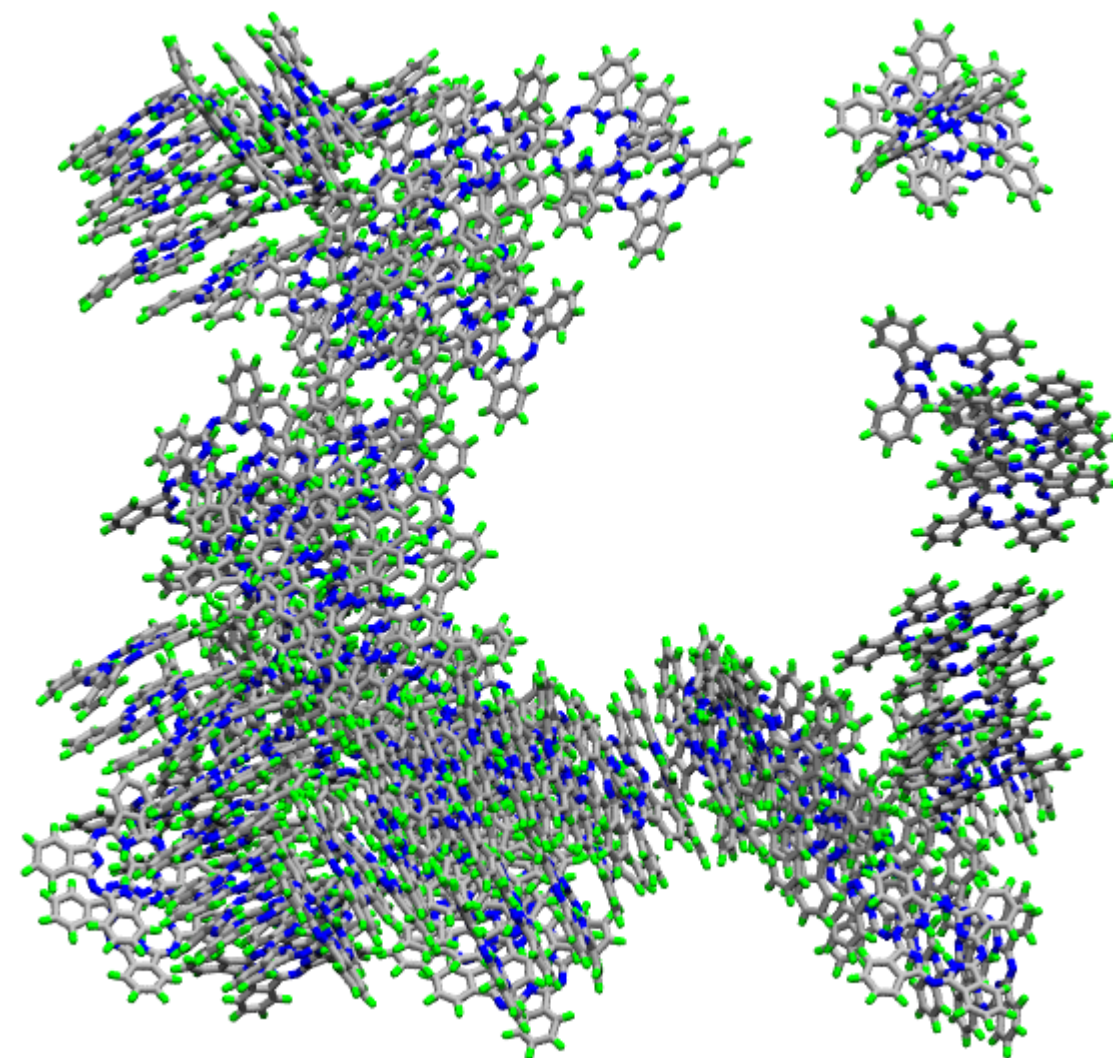

1:50

(b)

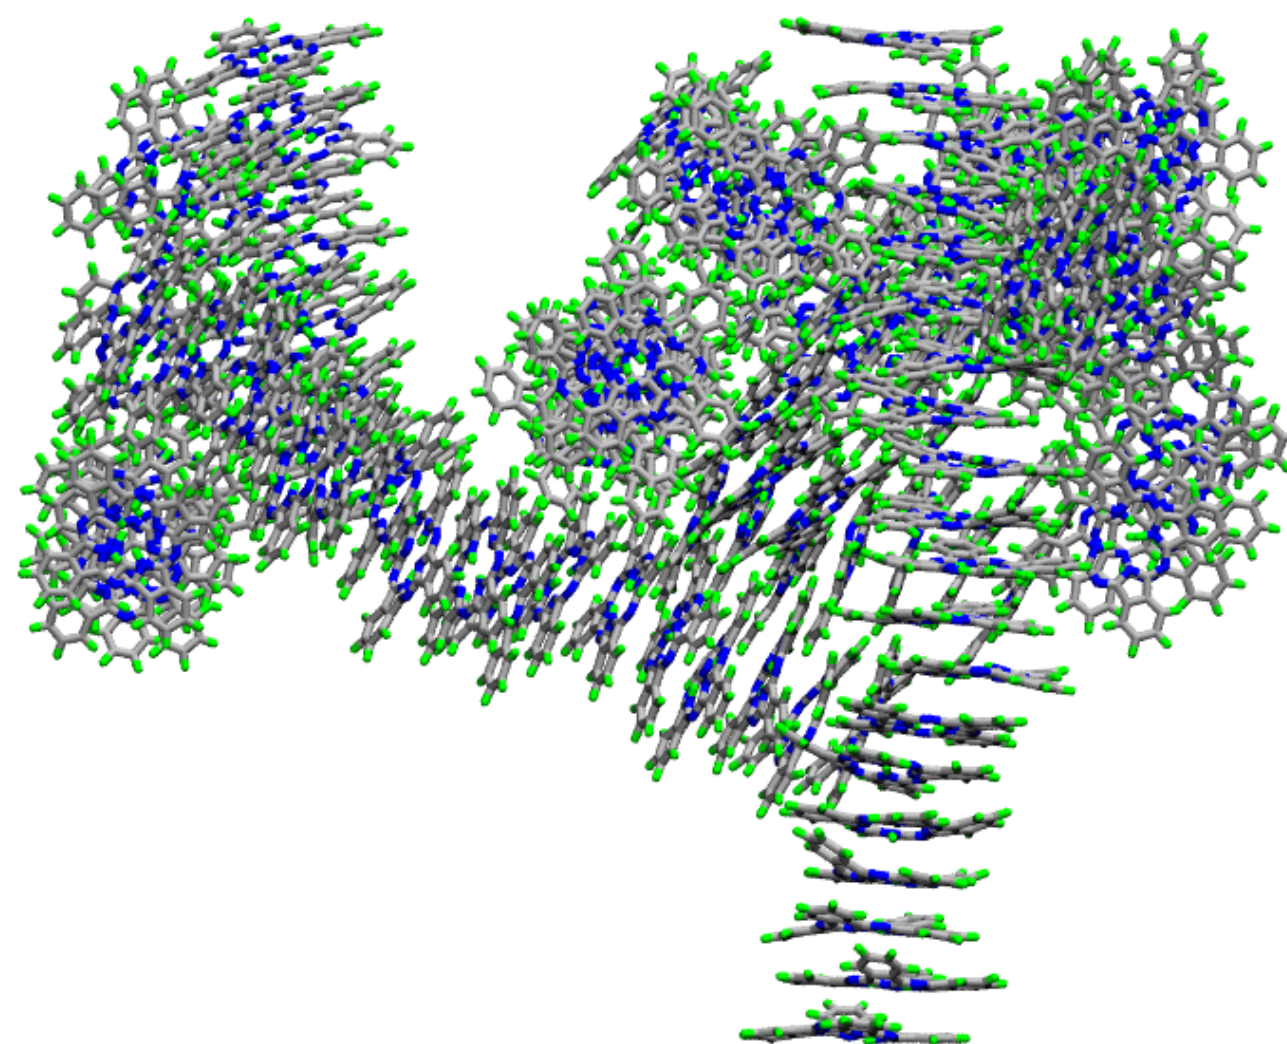

1:80

(c)

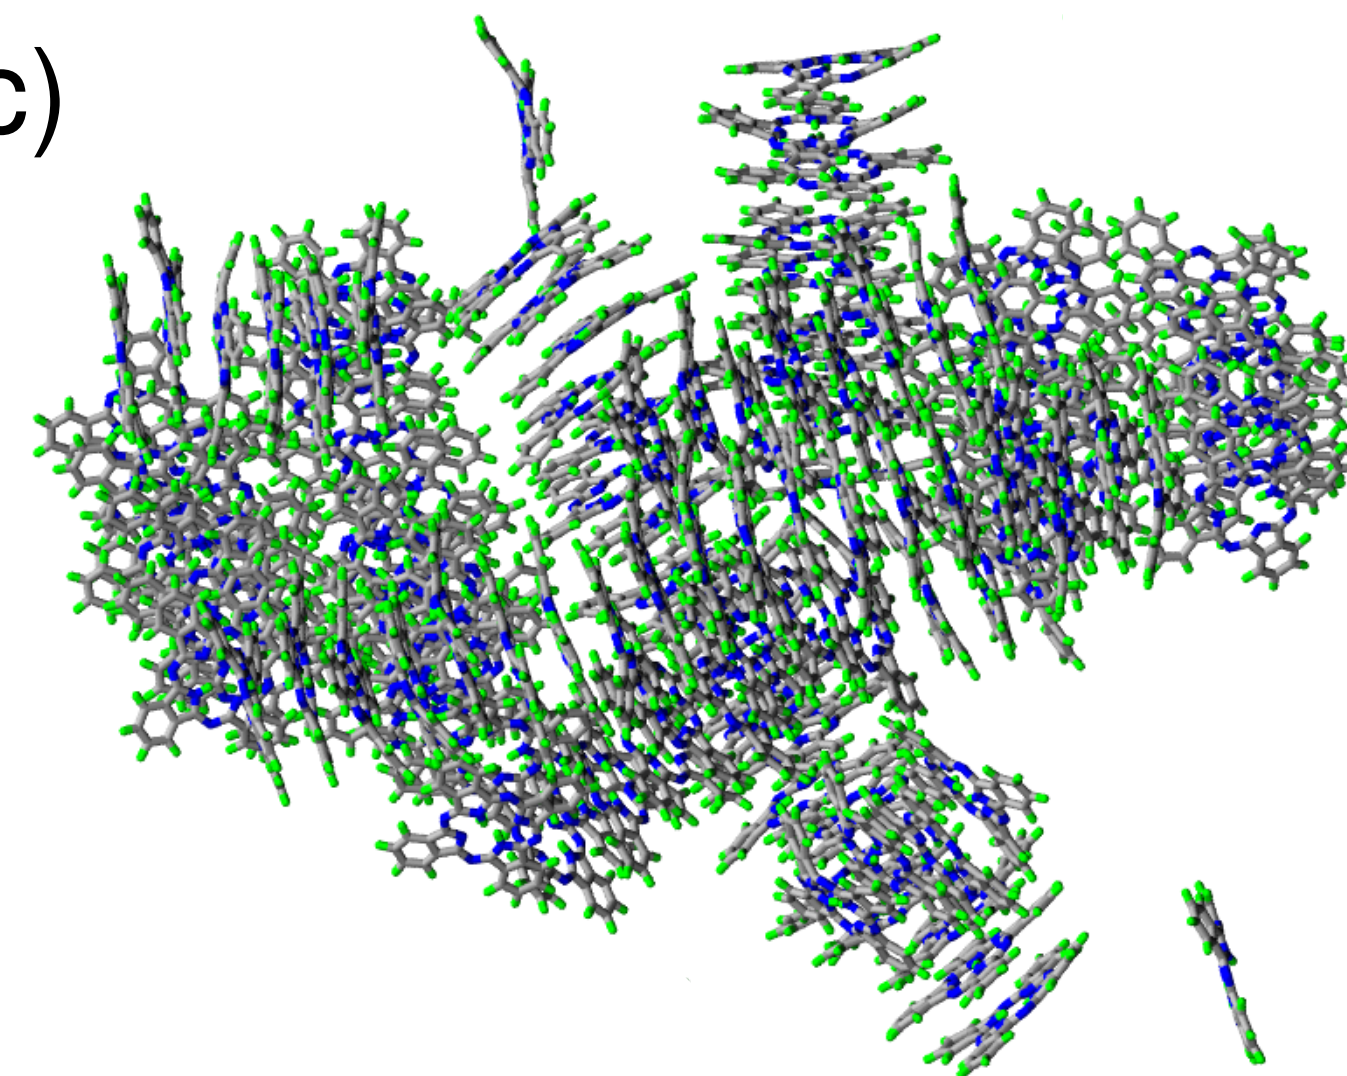

1:118

(d)

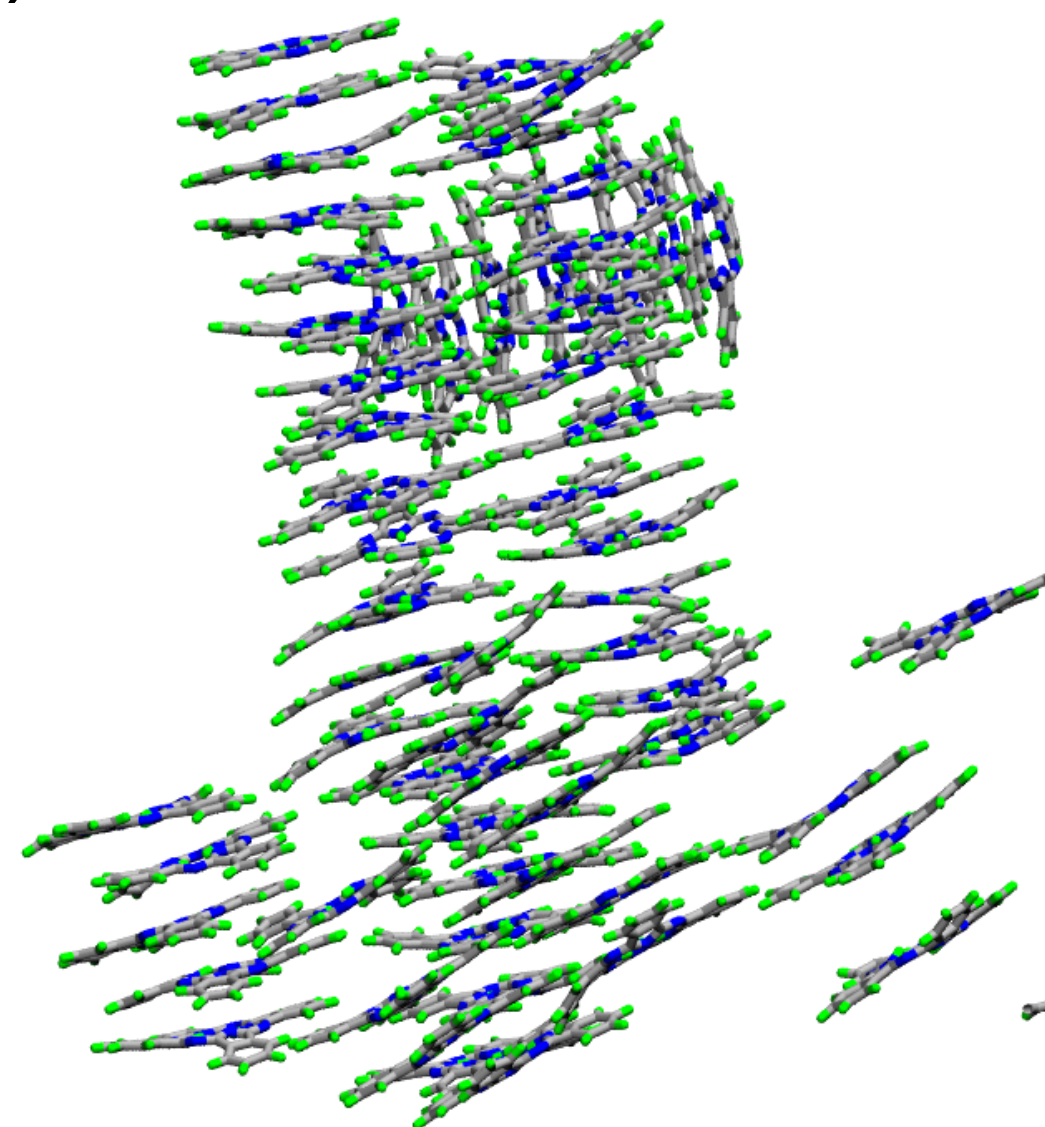

1:125

(e)

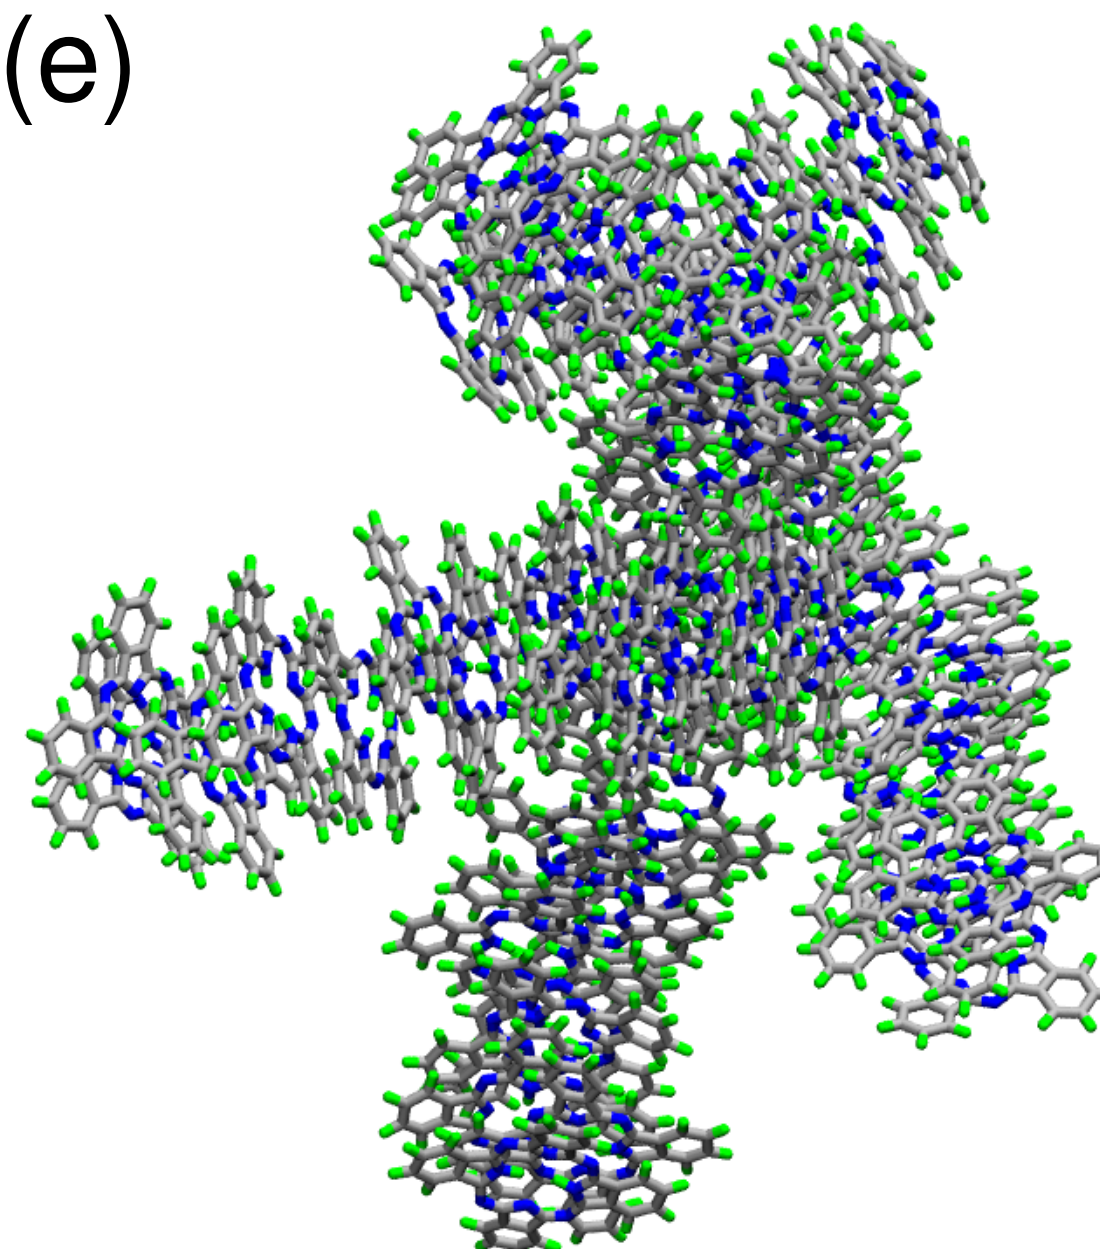

1:259

Supplement: d3cp03512c1.zip [file d3cp03512c1.zip]

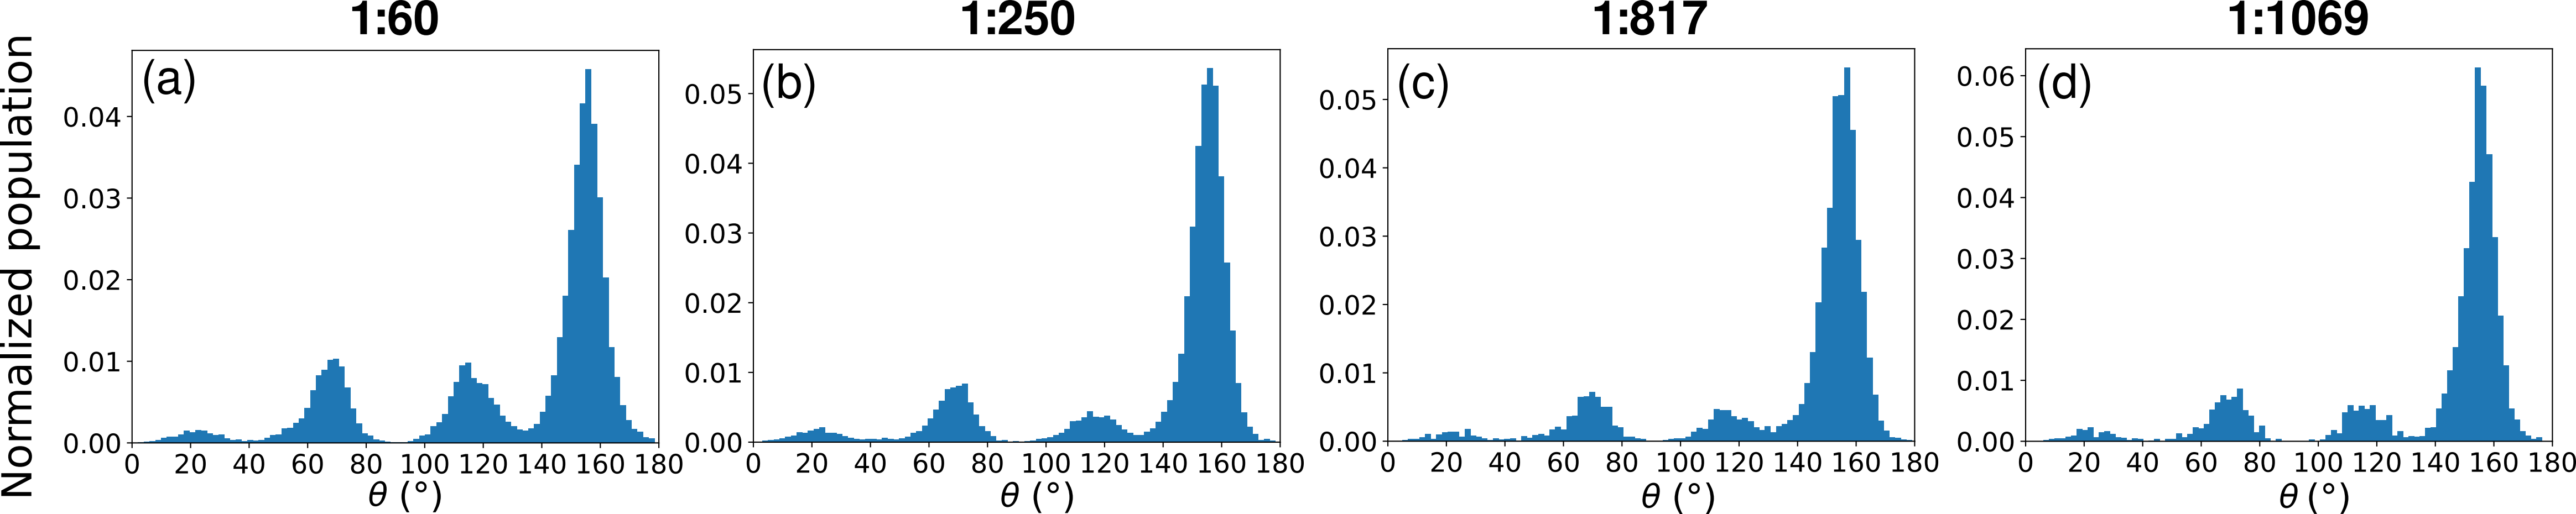

Supplement: d3cp03512c1.zip [file d3cp03512c1.zip]
